# 1 Title: Disentangling the aging network of a termite queen

2

3 José Manuel Monroy Kuhn<sup>1,2,\*</sup>, Karen Meusemann<sup>1,3</sup> and Judith Korb<sup>1,\*</sup>

4 <sup>1</sup> Department of Evolutionary Biology & Ecology, Institute of Biology I, Albert Ludwig University  
5 of Freiburg, Hauptstr. 1, D-79104 Freiburg (i. Brsg.), Germany

6 <sup>2</sup> Computational Discovery Research, Institute for Diabetes and Obesity, Helmholtz Zentrum  
7 München, Ingolstaedter Landstr. 1, D-85764 Neuherberg, Germany

8 <sup>3</sup> Australian National Insect Collection, CSIRO National Research Collections Australia, Clunies  
9 Ross Street, Acton, ACT 2601, Canberra, Australia

10

11 \* corresponding authors: [judith.korb@biologie.uni-freiburg.de](mailto:judith.korb@biologie.uni-freiburg.de); [manuel.kuhn@helmholtz-](mailto:manuel.kuhn@helmholtz-)  
12 [muenchen.de](mailto:muenchen.de)

13

## 14 Abstract

15 **Background:** Most insects are relatively short-lived, with a maximum lifespan of a few weeks, like  
16 the aging model organism, the fruit-fly *Drosophila melanogaster*. By contrast, the queens of social  
17 insects (termites, ants, some bees and wasps) can live for more than a decade. This makes social  
18 insects promising new models in aging research providing insights into how a long reproductive life  
19 can be achieved. Yet, aging studies on social insect reproductives are hampered by a lack of  
20 quantitative data on age-dependent survival and time series analyses that cover the whole lifespan  
21 of such long-lived individuals. We studied aging in queens of the drywood termite *Cryptotermes*  
22 *secundus* by determining survival probabilities over more than 15 years and performed  
23 transcriptome analyses for queens of known age that covered their whole lifespan.

24 **Results:** The maximum lifespan of *C. secundus* queens was 13 years with a median maximum  
25 longevity of 11.0 years. Time course and co-expression network analyses of gene expression  
26 patterns over time indicated a non-gradual aging pattern. It was characterized by networks of genes  
27 that became differentially expressed only late in life, namely after an age of 10 years, which  
28 associates well with the median maximum lifespan for queens. These old-age gene networks reflect  
29 processes of physiological upheaval. We detected strong signs of stress, decline, defence and repair  
30 at the transcriptional level of epigenetic control as well as at the post-transcriptional level with  
31 changes in transposable element activity and the proteostasis network. The latter depicts an  
32 upregulation of protein degradation, together with protein synthesis and protein folding, processes  
33 which are often down-regulated in old animals. The simultaneous upregulation of protein synthesis  
34 and autophagy is indicative for a stress-response mediated by the transcription factor *cnc*, a  
35 homolog of human *nrf* genes.

36 **Conclusion:** Our results show non-linear senescence with a rather sudden physiological upheaval at  
37 old-age. Most importantly, they point to a re-wiring in the proteostatis network as central for  
38 explaining the long life of social insect queens.

39

#### 40 **Keywords**

41 RNASeq, transcriptomes, ageing, social insects, weighted gene co-expression networks, WGCNA,  
42 time series, termite, lifespan, senescence

## 43 **Background**

44 Almost all animals age, but at different pace [1]. The fruit fly *Drosophila melanogaster* lives only  
45 for around seven weeks [2], while the clam Ocean Quahog, *Arctica islandica*, can have a lifespan of  
46 more than 400 years [3]. Generally, organisms with large differences in rates of aging are found  
47 between widely divergent species [1,4], which makes controlled comparisons of the underlying  
48 aging mechanisms difficult.

49 Classical model organisms typically have a short lifespan and can be characterized by r-life history  
50 strategies ('live fast, have many offspring and die young') as exactly these traits make them good  
51 model organisms. Social insects such as termites, ants, or the honeybee, offer promising new  
52 insights into aging research because individuals with the same genetic background can differ by  
53 orders of magnitudes in lifespan. Within a social insect colony, which is generally a large family,  
54 the reproducing queen (and in termites, also the king) can reach lifespans of more than 20 years,  
55 while non-reproducing workers have a lifespan of a few months only [5-8]. However, quantitative  
56 demographic data covering the whole lifespan of queens are inherently rare and many reports on  
57 queen-longevity are more anecdotal. Thus, it is largely unknown for long-lived queens whether they  
58 age gradually or whether aging is a more sudden event.

59 During recent years, several pioneering studies, especially on the honeybee, revealed exciting new  
60 insights into the mechanisms of how queens can live so long. In the honeybee, juvenile hormone  
61 (JH) seems to have lost its direct gonadotropic function in adults so that queens have a high  
62 expression of the yolk precursor gene vitellogenin (*Vg*) without requiring high JH titres (*e.g.*,  
63 [9,10]). This result has led to the hypothesis that uncoupling JH and *Vg* expression might account  
64 for the long life of honeybee queens [9] as well as social insect queens more generally [11] because  
65 the life-time shortening consequences of high JH titers are absent. However, this re-wiring along the  
66 JH-*Vg* axis is not universal for all social Hymenoptera, since the queens of many other ant and bee

67 species require JH for vitellogenesis (*e.g.* [12] and references therein). For termites, fewer studies  
68 exist, but JH is required for vitellogenesis [13,14]. Hence, other mechanisms must exist to explain  
69 the long life of termite queens. Studies of the subterranean termite *Reticulitermes speratus*  
70 implicated the involvement of a *breast cancer type 1 susceptibility (BRCA1)* homolog [15], which is  
71 involved in DNA repair [16], and better protection against oxidative stress by superoxide  
72 dismutases and catalases [17,18]. The latter have also been discussed for other social Hymenoptera,  
73 including ants and the honeybee. Yet overall evidence of the role of oxidative stress is less clear  
74 (reviewed in [19-21]). Furthermore, regulation of the activity of transposable elements (TEs) [22],  
75 and changes in the insulin/insulin-like growth factor1 signalling (IIS) and target of rapamycin  
76 (TOR) pathways [23] have been linked with caste-specific aging differences in termites. Both, the  
77 TOR and IIS pathway, have been associated with longevity in model organisms from *D.*  
78 *melanogaster* to mice and humans [24-26]. They are the most intensively studied aging related  
79 pathways and they have also been associated with caste differences in social Hymenoptera (*e.g.*,  
80 [27-31]). Yet, all studies on social insects suffer from a lack of time-series data to investigate  
81 molecular changes across the lifespan of long-lived queens. Like the demographic life history data,  
82 such data are inherently difficult to obtain due to the long lifespan of queens. However, they are  
83 necessary (i) to understand the aging process, (ii) to work out potential changes compared to  
84 solitary insects, and (iii) to identify the relevant age-classes for detailed studies. The latter is a  
85 completely overlooked issue but highly relevant. If, for example, aging is a non-linear process,  
86 differences across studies might just be consequences of none-comparable age-classes between  
87 studies.

88 We studied aging in termite queens of known age across their entire lifespan to measure at the  
89 ultimate, eco-evolutionary level age-dependent survival and at the proximate, mechanistic level  
90 age-specific changes in gene expression. For the latter, we generated head and thorax

91 transcriptomes of queens of different age (for an outline of the workflow see Additional File 1,  
92 Figure S1). We used field collected, newly established colonies of the wood-dwelling termite  
93 *Cryptotermes secundus* (Hill, 1925) (Blattodea, Isoptera, Kalotermitidae) that were kept under  
94 identical conditions in the laboratory for a time span of 15 years. Keeping them under constant and  
95 optimal conditions allowed us to study intrinsic aging, disentangled from causes of extrinsic  
96 mortality such as predation, food shortage, or disease. As typical for wood-dwelling termite species,  
97 *C. secundus* colonies are founded in a piece of wood, which serves as food and shelter and which  
98 workers never leave to forage outside. Such species have a low social complexity with small  
99 colonies and totipotent workers that develop into sexuals.

100

## 101 **Results**

### 102 **Survival analysis**

103 Overall, we had surviving founding queens from an age of two years up to a maximum of 13 years.  
104 The potentially 14- and 15-year old queens all had died as had most queens with a potential age of  $\geq$   
105 12 years. Out of eight queens in this ‘old-age’ class, only a single queen (13 years) had survived  
106 (Fig. 1). The median longevity of the queens in the laboratory after successful colony establishment  
107 was estimated with Kaplan Meier survival analysis to be 12.0 years (SE:  $\pm 0.54$ ) (mean longevity:  
108 11.1 years, SE:  $\pm 0.66$ ) (Fig. 1).

109

### 110 **Identifying transcripts that change their expression with age: age-related DETs**

111 To study gene expression changes over the lifetime of queens we generated transcriptomes of head  
112 and thorax from twelve queens with different chronological age since onset of reproduction, from  
113 two until 13 years, covering the complete lifespan of *C. secundus* queens: 2, 3, 4, 5, 6, 7, 8, 9, 10  
114 (two samples), 11, and 13 years (Additional File 2, Table S1).

115 A total of 169 transcripts were significantly differentially expressed (DETs) over time as revealed  
116 by Iso-MaSigPro time series analysis (Additional File 2, Table S2). According to their expression  
117 pattern, DETs were grouped into six Iso-MaSigPro clusters (hereafter, ‘cluster’) (Fig. 2). Cluster 1  
118 represented 44 DETs, which were slightly expressed in young queens followed by a decline at  
119 middle ages and a strong increase when queens became older. The 32 DETs of cluster 2  
120 characterized young queens with a declining expression with age. Clusters 3 and 5 comprised 31  
121 and 37 DETs, respectively, that were highly expressed in middle aged queens, while cluster 4 and  
122 cluster 6 (15 and 10 DETs) characterized old queens with no expression in young ones. Thus, in the  
123 following we referred to the DETs as young (cluster two), middle-aged (clusters three and five) and  
124 old DETs (clusters one, four and six). Details for all clusters are provided in Additional File 2,  
125 Table S2.

126

### 127 **Identifying modules of co-expressed transcripts**

128 To identify modules of co-expressed transcripts, we performed a weighted gene co-expression  
129 network analysis (WGCNA). It revealed a total of 254 modules of co-expressed transcripts. Based  
130 on eigengene values, 13 modules correlated significantly positively with age and 13 negatively (see  
131 Additional File 1, Figures S2 and S3; Additional File 3 (WGCNA module-age association, shown  
132 are eigengene values for all modules).

133

### 134 **Identifying transcript co-expression modules with age-related DETs**

135 Within the age-correlated WGCNA modules, we identified age-related DETs. The negatively age-  
136 correlated module ‘seashell4’ had the highest number of young DETs (10 DETs). No gene ontology  
137 (GO) term was enriched for this module. The highest number of old DETs were found in the  
138 positively age-correlated modules ‘cyan’ (89 DETs) and ‘tan’ (79 DETs) (Additional File 2, Table

139 S3 and S4). Only broad categories were enriched in the ‘cyan’ module (*e.g.* RNA metabolic process  
140 and gene expression) and the ‘tan’ module was enriched for ribosomal and tRNA related functions  
141 (Additional File 1, Figure S4).

142

### 143 **Extracting age-related subnetworks based on age-related DETs**

144 To generate subnetworks related to the age-related DETs, we located them in the WGCNA co-  
145 expression network. These DETs and their one- and two-step neighbors (*i.e.*, the ‘second level  
146 neighborhood’) were then extracted from the co-expression network, which resulted in 50  
147 subnetworks of different sizes (for more details see Methods) (Additional File 1, Figure S5). Note,  
148 DETs might be located at the boundaries of multiple WGCNA modules which means the  
149 subnetworks obtained consist of fragments of multiple WGCNA modules. The resulting  
150 subnetworks either contained young and middle-aged DETs or old DETs, with a single exception  
151 where a middle-aged DET was in the periphery of the largest subnetwork containing old DETs. The  
152 largest subnetwork containing either young and middle-aged DETs (hereafter, young subnetwork)  
153 or old DETs (plus a single middle-age DET; hereafter old subnetwork) were further analyzed.

154

#### 155 *Young subnetwork*

156 The largest young subnetwork comprised 164 transcripts (out of these 24 Iso-MaSigPro DETs) of  
157 which only 12 (7%) were one-to-one orthologs to *D. melanogaster* genes (Additional File 2, Table  
158 S3). The GO enrichment analysis of the young subnetwork showed multiple Biological Process  
159 (BP) terms related to RNA catabolism, but these GO terms were not significant after correcting for  
160 multiple testing (Additional File 2, Figure S6).

161

162 *TE activity and genome instability.* 53 DETs (32%) of the young subnetwork were related to TEs  
163 (Fig. 3 and Additional File 2, Table S3), comprising TEs and genes from TE defense pathways.  
164 This included one homolog of the gene *argonaute 2 (ago2)* (two transcripts), an essential gene of  
165 the endo-siRNA pathway which silences TEs [32], and *arsenite 2 (ars-2)* which is required for  
166 siRNA and miRNA-mediated TE silencing [33]. Additionally, we found two genes connected to  
167 DNA damage response and genome instability: *kin17* and *PIF1-like* gene.

168

169 *Other signatures.* From well-known aging pathways, we identified (i) *inositol polyphosphate*  
170 *phosphatase 2 (mipp2)* and (ii) *adenylyl cyclase 76E (ac76E)*. The former is part of the TOR  
171 pathway and has been associated with longevity [34] and the latter is activated by the transcription  
172 factor ‘Forkhead box O’ (*foxo*). Additionally, we found several fecundity related DETs. They  
173 included two transcripts of the gene *hu li tai shao (hts)* (one a DET of IsoMaSigPro cluster two) and  
174 one homolog of the gene *bällchen (ball)* (two transcripts) (one a DET of cluster five, Fig. 3)

175

176 *Old subnetwork*

177 The largest ‘old subnetwork’ comprised 1,098 transcripts (out of these 42 Iso-MaSigPro DETs).  
178 521 transcripts (47%) were identified as one-to-one orthologs of *D. melanogaster* genes (Additional  
179 File 2, Table S4). Iso-MaSigPro DETs in the old subnetwork belonged mainly to Iso-MaSigPro  
180 clusters 1 and 4. The second level neighborhoods of these DETs were connected in the network and  
181 a GO enrichment analysis revealed multiple GO terms associated with protein related functions,  
182 including translation, protein folding, unfolded protein binding, proteolysis involved in cellular  
183 protein catabolic process, protein targeting to ER, ribosome, and proteasome complex (Additional  
184 File 1, Figures S7 and S8). 198 transcripts of the old subnetwork (18%) were involved in protein  
185 translation, protein folding, and protein catabolism and proteolysis (Figs. 4 and 5 [35,36] and



186 Additional File 2, Table S4). Additionally, 61 transcripts (~6%) were related to TEs (Additional  
187 File 2, Table S4).

188

189 *Epigenetic modifications, transcriptional regulation, and TE activity.* Many genes of the old  
190 subnetwork are involved in de/acetylation and methylation of DNA, which are important epigenetic  
191 modifications that regulate gene expression and genome stability [37-39] (Additional File 2, Table  
192 S4).

193 Most strikingly, two crucial histone acetylation modifying complexes, the Tip60 acetyltransferase  
194 complex and the male specific lethal (*msl*) complex were represented in the old subnetwork. The  
195 former included the genes *dom*, *ing3*, *mrg15*, *pont* and *rept*, and the latter *mml-1*, *mml-3* and *mof*.

196 Genes involved in deacetylation of DNA were, for instance, *sirtuin 1 (sirt1)*, *histone deacetylase 3*  
197 (*HDAC3*), and *histone deacetylase 6 (HDAC6)*. Genes linked to epigenetic histone methylation

198 included, for instance, *ash-1* and *lid*. Another well represented group of genes connected to

199 expression regulation in the old subnetwork were spliceosome components and splicing factors.

200 Additionally, we found in the old subnetwork important transcripts related to TE silencing: *dicer-2*,

201 *Hsc70-4*, *Hsc70-3*, *Hsp83*, *trsn*, *armi*, *Rm62*, *Gasz*, *Tudor-SN*, and *Hel25E*. Details are given in

202 Additional File 2, Table S4.

203

204 *Proteostasis and oxidative stress.* Related to proteostasis we detected a strong signal for protein

205 synthesis and degradation. Regarding protein synthesis, the old subnetwork comprised many

206 transcripts coding for initiation, elongation and termination factors, as well as many ribosomal

207 proteins and aminoacyl-tRNA synthetases (Fig. 4; Additional File 2, Table S4). Regarding protein

208 degradation, almost all subunits of the ubiquitin proteasome system (UPS) were present (Fig. 5) as

209 well as autophagy genes, heat shock proteins, and the transcription factor *xbp1*. *Xbp1* is involved in

210 the ‘unfolded protein response’ (UPR) and in the ER-associated protein degradation (ERAD)  
211 pathway [40,41].

212 Additionally, *BRCA1* was also present in the old subnetwork. This gene is involved in oxidative  
213 stress response, and in the transcriptional activation of proteasomal genes by stabilizing the  
214 transcription factor *cnc/nrf-2* (*cap-n-collor/nuclear factor erythroid 2–related factor 2*) [42]. Other  
215 genes in the old subnetwork involved in oxidative stress response and transcriptionally activated by  
216 *nrf-2* were thioredoxin and S-glutathione transferase.

217

218 *Other signatures.* Additionally, the old subnetwork was characterized by a signature of ecdysone  
219 biosynthesis with *ecdysone receptor (EcR)*, *ecdysone-induced protein 75B (Eip75B)*, *phantom* and  
220 *disembodied*. The presence of *Phosphatidylinositol 3 kinase 68D (Pi3K92E)* links to the IIS  
221 pathway.

222

### 223 **Locating age-related co-expression modules in the age-related subnetworks**

224 Finally, we inspected those WGCNA modules with a large fraction of transcripts in the young and  
225 old subnetworks as well as those modules that were significantly associated with age.

226 In the young subnetwork, WGCNA modules with a large fraction of transcripts were ‘saddlebrown’  
227 and ‘skyblue4’ which both did not significantly correlate with age. Significantly age-correlated co-  
228 expression modules were firebrick2, indianred1 and seashell4 (Additional File 1, Figure S2). No  
229 GO terms were significantly enriched for any of these modules.

230

231 In the old subnetwork, the modules with a large fraction of transcripts were ‘green’ and  
232 ‘paleturquoise’ which again did not significantly correlate with age. The old subnetwork contained  
233 transcripts of 13 significantly age-correlated co-expression modules (Additional File 1, Figure S3).

234 The GO enrichment analysis of these modules revealed several terms involved in protein related  
235 functions, including ribosome biogenesis, rRNA processing, protein folding, translation, unfolded  
236 protein binding, protein catabolic process, protein transport, tRNA aminoacylation for protein  
237 translation, and proteasome core complex (Additional File 1, Figure S4, S9, S10 and Additional  
238 File 4, Table S5).

239

## 240 **Discussion**

241 Our study revealed a median maximum reproductive longevity of *C. secundus* queens of 12 years  
242 with a maximum lifespan of 13 years when excluding all causes of extrinsic mortality in the  
243 laboratory. The curve suggests a rather sudden decline in live expectancy after an age of around 11  
244 years; out of eight queens with a potential age  $\geq 12$  years, all had died, except one 13-year old  
245 queen (Fig. 1). The survival curve indicates a type I survivorship, after queens have successfully  
246 founded a colony and without extrinsic mortality.

247

248 Our transcriptome study identified six clusters of transcripts that were significantly differentially  
249 expressed with age (DETs) (Fig. 2): one cluster for young queens (cluster 2), two for medium aged  
250 queens (cluster 3 and 5) and three for old queens (cluster 1, 4, and 6). This implies that three  
251 ‘molecular’ life stages can be distinguished in *C. secundus* queens with the third corresponding to  
252 old, aged queens that will probably die soon as no queen reached a lifespan beyond 13 years. The  
253 co-expression network analysis, which extracted subnetworks based on age-related DETs, resulted  
254 in two main subnetworks, a young and an old subnetwork. This implies that there are two *age-*  
255 *related* ‘molecular’ life stages, as DETs/genes of young and medium ages belonged to the same  
256 young subnetwork.

257

258 **Young subnetwork**

259 The young subnetwork contained DETs characteristic for young and medium ages. This shows the  
260 similarity in expression of these two age stages. Not unexpectedly, the young subnetwork indicates  
261 an upregulation of transcripts linked with fecundity (*e.g.*, *hts*, *ball*) and of the TOR pathway  
262 (*mipp2*) which has been associated with longevity [34]. The upregulation of *Ac76E* may imply that  
263 the IIS pathway is down because this gene is activated by the transcription factor foxo which is  
264 inhibited by an upregulated IIS pathway. However, other evidence suggests that, like in other social  
265 insects (*e.g.* [12] and references therein), queens are characterized by an upregulated IIS pathway  
266 [23]. Additionally, we detected several upregulated TEs-related transcripts associated with signs of  
267 an upregulation of the endo-siRNA pathway (*e.g.* *ago2*, *ars*) which is a transcriptional and post-  
268 transcriptional TE-defence mechanism of the soma [32,33,43] (Kim, Lee and Carthew, 2007; Sabin  
269 *et al.*, 2009; Piatek and Werner, 2014).

270

271 **Old subnetwork**

272 The old subnetwork contained many more transcripts (1,098 vs. 164 in the young subnetwork). Our  
273 results imply a physiological stage of upheaval shortly before queens die. There were strong signs  
274 of decline and repair at the upstream transcriptional level of epigenetic control as well as at the  
275 posttranscriptional level of TE-activity and the proteostasis network.

276

277 *Epigenetic modifications*

278 An upregulation of genes modifying histone marks implied considerable epigenetic changes that  
279 lead to altered gene expression as is typical for aging organisms:

280 First, our results indicate dynamic changes of ‘active’ histone marks of euchromatin because many  
281 genes related to H3K4 and H3K36 de/methylation and H4K16 de/acetylation were present in the

282 old subnetwork (Additional File 2, Table S4). For instance, the Tip60- as well as the msl-complex  
283 were well represented. Both complexes are involved in acetylation of histones, including H4K16,  
284 which, for instance, is indicative for replicative aging in yeast [44]. The upregulation of *Sirt1* may  
285 function as an antagonist as it deacetylates H4K16. The same applies for the deacetylases HDAC6  
286 and HDAC3, which can also deacetylate histones [39].  
287 Second, there is also evidence for changes of repressive histone mark of heterochromatin (*e.g.*  
288 linked to H3K9 and H3K27 acetylation) (Additional File 2, Table S4). For instance, the old age  
289 transcript ALP1 is an antagonist of HP1, the latter is involved in the maintenance of  
290 heterochromatin. HP1 generally decreases with age, and its overexpression can lead to an increased  
291 lifespan in *D. melanogaster* [45,46].

292

### 293 *TE activity*

294 In line with a deregulation of repressive histone mark of heterochromatin, several TE-related  
295 transcripts were also connected with the old subnetwork (Additional File 2, Table S4). TEs often  
296 are accumulated in heterochromatin which silences their activity [47]. Yet, dysregulation of  
297 heterochromatin can allow them to become active and this has been associated with aging [48,49].  
298 Also the upregulation of several genes from two TE-defense pathways - the endo-siRNA pathway  
299 (*e.g. dicer2, Hsc-70-4, trsn*) as well as the of piRNA pathways (*e.g.*, piRNA biosynthesis. *armi,*  
300 *gasz, Hel25E, Rm62*; ping-pong cycle: *Tudor-SN, qin*) - support the notion of active TEs. Both  
301 pathways silence TEs posttranscriptionally [50-52]. TE activity and especially the piRNA pathway  
302 has also been associated with aging and the longevity of termite reproductives in another termite  
303 species [22].

304

### 305 *Loss of proteostasis*

306 Our results revealed a very strong proteostasis signal indicative for an upheaval in protein  
307 synthesis, protein folding and protein degradation in old queens. Many genes from the proteostasis  
308 network were detected in the old subnetwork (Additional File 2, Table S4). They indicate an  
309 upregulation of protein degradation, together with protein synthesis and protein folding (Figs. 4 and  
310 5). This is unusual because old organisms are typically characterized by a downregulation of all  
311 these processes (Fig. 6).

312

313 *Protein synthesis.* Many transcripts coding for ribosomal proteins and aminoacyl-tRNA synthetases  
314 were found in the old subnetwork, indicative of upregulated protein synthesis (Additional File 2,  
315 Table S4). This is further supported by a strong signal of an active TORC1 system which promotes  
316 protein synthesis (Fig. 7 [53-55]). Thus, for instance, many downstream eukaryotic initiation  
317 factors (eIF4A, eIF4B, eIF4E, eIF4G) and eukaryotic elongation factor (eEF2) transcripts were  
318 found in the old subnetwork (Fig. 4). They activate, ribosome biogenesis, translational elongation,  
319 and cap-dependent translocation (Fig. 7).

320

321 *Protein degradation.* Normally, an active TORC1 system is associated with a downregulation of  
322 protein degradation as it inhibits proteolytic systems [54-56] and autophagy (*e.g.*, upregulated  
323 TORC1 inhibits ATG1, which is necessary for autophagy activation; Fig. 7). Surprisingly,  
324 however, we found strong evidence of upregulated protein degradation in the old subnetwork.  
325 Several transcripts linked to autophagy, almost all subunits of the UPS, the UPR-, and the ERAD  
326 pathway as well as heat shock proteins characterized the old subnetwork (Figs. 5 and 6; Additional  
327 File 2, Table S4).

328

329 *Linking protein synthesis and degradation.* The simultaneous upregulation of protein synthesis and  
330 autophagy might be explained by a stress response. In *D. melanogaster* as well as in humans, under  
331 stress conditions upregulated TORC1 enhances an oxidative stress response, controlled by the  
332 transcription factor *cnc*, a homolog of human *nrf* genes (Fig. 7). Ubiquitinated proteins and  
333 damaged mitochondria activate *cnc/nrf-2* via p62, supported by upregulated TORC1, which then  
334 activates oxidative stress response genes [57,58] (Ichimura *et al.*, 2013; Aramburu *et al.*, 2014).  
335 Additionally, *cnc* is known to activate chaperones (protein folding) and the proteasome [59], and  
336 this has been associated with lifespan expansion in *D. melanogaster* and *Caenorhabditis elegans*  
337 [60,61].

338 Support for the conclusion of a stress-associated, active *cnc* transcription factor in old queens  
339 comes from several transcripts in the old subnetwork (Fig. 7): (i) BRCA1, which indirectly activates  
340 *cnc* by inhibiting *cnc* inhibitor *Keap1*, and (ii) the *Tip 60* complex as well as genes that are  
341 transcriptionally activated by *cnc*, such as *thioredoxin*, *S-Glutathione transferases* and *UPS* genes  
342 (Fig. 7).

343 Hence, our results imply that old *C. secundus* queens are in a stage of stress. They have mounted  
344 stress response systems mediated by *cnc*, including protein degradation and protein folding.  
345 However, it is unusual that old queens can do this. In *D. melanogaster*, only young individuals can  
346 mount this stress response [59] (Tsakiri *et al.*, 2013). The constant activation of the proteasome in  
347 these very old queens may lead to their death (note, the studied queens had reached their maximum  
348 lifespan, we never had older queens) as the constant activation of the proteasome in transgenic flies  
349 was detrimental for survival [59].

350

351 **Comparison with other social insects**

352 There has been a debate about the role of oxidative stress to explain the long lifespan of social  
353 Hymenoptera queens; yet evidence is inconclusive (*e.g.* reviewed by [19-21]). For instance,  
354 markers of oxidative stress in the brain of honey bee workers do not increase with age, although  
355 they live shorter than queens [62]. In the ant *Lasius niger*, both workers and males show higher  
356 activity of the antioxidant superoxide dismutase than queens, but both live shorter than queens  
357 [63]. These studies have shown that higher expression of oxidative stress response genes do not  
358 necessarily correlate with longer lifespans. For the termite *Reticulitermes speratus*, it has been  
359 suggested that queens are better protected against oxidative stress as qRT-PCRs studies showed a  
360 higher expression of the antioxidants catalases and peroxiredoxins in queens compared to workers  
361 [17], while kings were characterized by a high expression of *BRCA1* (in the fat body) compared to  
362 workers [15]. Unfortunately, the age of the studied reproductives is not known. It would be of  
363 interest to study expression of these genes with age, as this would contribute to a better  
364 understanding of the aging process but such studies are rare.

365

366

367

## 368 **Conclusion**

369 Our results imply that *C. secundus* queens do not age gradually, rather at old age there is a  
370 physiological stage of upheaval, characterized by signs of stress (activity of TEs, active *crc*) and  
371 defense (piRNA pathways) / repair (protein degradation and synthesis) before the animals die.  
372 This apparently sudden decline is in line with the few life history records of social insect queens  
373 that exist. They also found no signs of gradual senescence but an abrupt death (*e.g.*, the ant  
374 *Cardiocondyla obscurior* [64]; see also Fig. 1). This stresses the importance of using queens of  
375 known age for aging studies as processes revealed from middle-aged versus old queens probably



376 differ considerably. Our study is the first addressing the aging process for a social insect by

377 studying the complete lifespan of queens.

## 378 **Methods**

379 Figure S1 (Additional File 1) provides a schematized workflow of the analyses described in the  
380 following sections.

381

### 382 **Collection and colony maintenance**

383 From 2002 until 2016, *C. secundus* colonies were collected from mangroves near Palmerston -  
384 Channel Island (12°30' S, 131°00' E; Northern Territory, Australia) when they were less than one  
385 year old [65]. Colonies of an age of less than one year can be identified by the size and slightly  
386 lighter sclerotization of the founding reproductives (primary reproductives), the presence of less  
387 than 20 workers and short tunnel systems of a few centimeters. All collected colonies were  
388 transferred to *Pinus radiata* wood blocks and transported to the laboratory in Germany, where they  
389 were kept under standardized conditions in a climate room with a temperature of 28 °C, 70%  
390 humidity and a 12h day/night rhythm (Additional File 2, Table S1). Under these conditions,  
391 colonies develop like in the field (see [66]). Up until 2019 wood blocks were split and the colonies  
392 were extracted to determine survival of reproductives.

393

### 394 **Survival analysis**

395 The survival of primary queens (and kings) was determined by their presence /absence. Founding  
396 (primary) queens can be identified by their dark brown color, compound eyes and wing abscission  
397 scars. If the primary reproductives had died and the colony was still alive, they had been replaced  
398 by neotenic replacement reproductives which lack these traits. The median longevity of queens was  
399 determined using Kaplan Meier survival analysis in SPSS 23 [67]. Only colonies that survived the  
400 transfer from the field to the laboratory in Germany and the re-establishment in the new wood block  
401 were used for this analysis. This resulted in a sample size of 41 colonies. Overall, we had surviving

402 primary queens from an age of one year up to a maximum of 13 years. The three potentially 14- and  
403 15-year old queens were all dead.

404

#### 405 **Transcriptome study**

##### 406 *RNA extraction and sequencing*

407 RNA was extracted from twelve queens with different chronological age since onset of  
408 reproduction from two years until 13 years: 2, 3, 4, 5, 6, 7, 8, 9, 10 (two samples), 11, and 13 years.  
409 In colonies older than 13 years, the original queen was always replaced by a neotenic replacement  
410 queen.

411 An in-house protocol was followed for RNA extraction (see [23]). Individuals were placed on ice  
412 and the gut was removed and discarded. The head together with the thorax were used for RNA  
413 extraction. Samples were transferred into peqGOLD Tri Fast™ (PEQLAB) and homogenized in a  
414 Tissue Lyser II (QIAGEN). Chloroform was used for protein precipitation. From the aqueous phase,  
415 RNA was precipitated using Ambion isopropyl alcohol and then washed with 75% ethanol.  
416 Obtained pellets were solved in nuclease-free water. DNA was subsequently digested using the  
417 DNase I Amplification Grade kit (Sigma Aldrich, Cat. No. AMPD1). We performed an RNA  
418 Integrity Number Analysis (RIN Analysis) measuring the RNA concentration with the Agilent  
419 RNA 6000 Nano Kit using an Agilent 2100 Bioanalyzer (Agilent Technologies) for quality control.  
420 Samples with total RNA were sent on dry ice to Beijing Genomics Institute (BGI) Tech Solutions  
421 (HONGKONG) Co. and then to the BGI-Shenzhen (PR China) for sequencing. The preparation of  
422 the cDNA libraries was performed by BGI according to their internal and proprietary standard  
423 operating procedure. The cDNA libraries were paired-end sequenced (not-strand specific) on  
424 Illumina HiSeq 2500 and 4000 platforms (100 base pairs read length and about 4 Giga bases per  
425 sample). Index sequences from the machine reads were demultiplexed and a quality -check and

426 filtering of raw reads was done using the package soapuke (-n 0.05 -l 20 -q 0.2 -p 1 -i -Q 2 -G --

427 seqType 1 and -A 0.5, <http://soap.genomics.org.cn/>).

428

429 *Processing of RNASeq raw reads*

430 FastQC (v0.11.4) [68] was used to evaluate the quality of the cleaned raw reads. To obtain a

431 transcript count table, the cleaned raw reads were pseudo-aligned with Kallisto (default settings,

432 v0.43.0) [69] (Bray *et al.*, 2016) against a *C. secundus* transcriptome obtained from a draft version

433 of the *C. secundus* genome (with estimated gene and transcript models, see [23,70]. The counts

434 estimated by Kallisto were normalized using DESeq2 (v1.18.1, count/size factor) [71] in R (v3.4.4)

435 [72].

436

437 *Time course analysis to identify age-associated differentially expressed transcripts (DETs)*

438 The normalized counts were used as input for the R package Iso-MaSigPro (v1.50.0) [73] to test for

439 differentially expressed transcripts (DETs) across time. Iso-MaSigPro is designed for the analysis of

440 multiple time course transcriptome data. It implements negative binomial generalized linear models

441 (GLMs) [73,74]. Significantly differentially expressed transcripts (FDR corrected p-value set to

442 0.05) were clustered using the clustering algorithm mclust in Iso-MaSigPro [73] resulting into six

443 Iso-MaSigPro clusters (Additional File 2, Table S2).

444

445 *Weighted Gene Co-expression Network Analysis (WGCNA) to identify networks of co-expressed*

446 *transcripts*

447 To obtain networks of co-expressed transcripts that were categorized as modules we performed a

448 Weighted Gene Co-expression Network Analysis (WGCNA). The counts obtained with Kallisto

449 (v0.43.0) [69] were transformed using variance stabilizing transformation (vst) as implemented in

450 DESeq2 (v1.18.1) [71]. The vst transformed counts were used to perform a co-expression network  
451 analysis with the R package WGCNA (v1.63) [75]. For more details on the methodology, see [75-  
452 77]. In short, (Additional File 1, Figure S1, workflow, right side), a similarity matrix was built by  
453 calculating Pearson correlations between the expression values of all pairs of transcripts. Using the  
454 similarity matrix, a signed weighted adjacency matrix was obtained as described by the formula:

$$a_{ij} = \left( \frac{1}{2} (1 + \text{cor}_{ij}) \right)^{\beta}$$

455 Where  $\text{cor}_{ij}$  is the Pearson correlation between the expression pattern of transcript ‘i’ and transcript  
456 ‘j’ (the similarity value). The value of  $\beta$  was chosen based on the soft-thresholding approach [75].  
457 With this value of  $\beta$ , we obtained a weighted network with an approximate scale-free topology  
458 ( $\beta=14$ , scale-free topology  $R^2 = 0.84$ ). In a signed weighted adjacency matrix negative and small  
459 positive correlations get negligibly small adjacency values shifting the focus on strong positive  
460 correlations. Seeing the adjacency matrix as a network, the nodes correspond to the transcripts and  
461 the connections between nodes correspond to the adjacency values (transformed correlation  
462 coefficients). A topological overlap matrix (TOM), which in addition to the adjacency matrix  
463 considers topological similarity (shared neighbors reinforce the connection strength between two  
464 nodes), was constructed using the adjacency matrix [78]. To define transcript modules, a  
465 hierarchical clustering tree was constructed using the dissimilarity measure (1-TOM). Transcript  
466 modules were defined by cutting the branches of the tree using the Dynamic Hybrid Tree Cut  
467 algorithm [79] and the minimum module size was set to 30 transcripts. Transcript modules with  
468 similar expression profile were merged by hierarchical clustering of the eigengene correlation  
469 values. Briefly, a hierarchical clustering tree was created with the eigengene dissimilarity measure  
470 (1-correlation coefficient of eigengenes) and a tree height cut of 0.20 was used (corresponds to a  
471 eigengene  $\text{cor} \geq 0.80$ ). Eigengenes were calculated with the function `moduleEigengenes` (default  
472 settings) [75]. A module eigengene corresponds to the first principal component of the module and

473 can be seen as a weighted average expression profile [75]. To find significantly associated modules  
474 with age, correlations between age and eigengenes of the merged modules were calculated. Each  
475 module was named after a color by WGCNA.

476 The adjacency matrix of the WGCNA was visualized using Cytoscape (v3.7.1) [80], only including  
477 pairs of nodes with a  $cor_{ij} \geq 0.90$ . The color of each module corresponds with the respective module  
478 name (*e.g.*, saddlebrown color for the saddlebrown module).

479

480 To identify co-expression modules containing age-related DETs, we looked for age-related DETs  
481 from the Iso-MaSigPro analysis in the WGCNA modules. Those modules which were significantly  
482 correlated with age and which contained the highest number of Iso-MaSigPro DETs were further  
483 inspected.

484

#### 485 **Identifying/Extracting age-related subnetworks based on age-related DETs**

486 To identify age-related subnetworks within the co-expression network, we combined the results of  
487 the Iso-MaSigPro analysis with those from the WGCNA and extracted subnetworks that were based  
488 on age-related Iso-MaSigPro DETs. Therefore, we extracted 1<sup>st</sup> and 2<sup>nd</sup> neighbors of DETs based on  
489 the WGCNA co-expression network (*i.e.*, the visual representation of the adjacency matrix). To do  
490 this, we used the ‘First neighbors’ function of Cytoscape. We selected an age-related DET from Iso-  
491 MaSigPro as transcript of interest. By calling the function, the neighboring transcripts were  
492 selected, which were then extracted to form a subnetwork. By calling the function twice, one  
493 obtains the one- and two-step neighbors (called ‘second level neighborhood’) of the transcript of  
494 interest. This was done for each DET identified in IsoMaSigPro.

495

496 The obtained subnetworks were clearly separated in those containing young Iso-MaSigPro DETs  
497 (young subnetworks) and those containing old Iso-MaSigPro DETs (old subnetworks). The largest  
498 subnetwork obtained for each group was used for further analysis paying attention to both,  
499 transcript identity as well as WGCNA module content. Thus, we looked, for instance, for WGCNA  
500 modules that had been identified to be age-related within the global WGCNA in these subnetworks.  
501 The AutoAnnotate Cytoscape plug-in (v1.3) [81] was used to annotate the subnetworks using the  
502 clustering algorithm ‘Markov Cluster’ (MCL) [82] to define and visualize sub-clusters, and the  
503 labeling algorithm ‘Adjacent Words’ to label the sub-clusters. The Cytoscape plug-in BiNGO  
504 (v3.0.3) [83] was used for GO enrichment analysis. The p-values of the GO enrichment analysis  
505 were adjusted for multiple testing using the FDR approach [84]. Subnetworks were graphically  
506 processed with Inkscape (v0.91, [www.inkscape.org](http://www.inkscape.org)).

507

#### 508 **Transcript (functional) annotation**

509 Nucleotide and protein sequences were obtained from the draft version of *C. secundus* genome  
510 [23,70]. For annotation, the translated transcripts were searched against the Pfam database (Pfam A,  
511 release 30) [85] with the software *hmmsearch* (option `--cut_ga`, HMMer v.3.1b2) [86] and against the  
512 InterPro database with the software InterProScan (v5.17-56.0) [87]. Additionally, we did a  
513 BLASTX search (NCBI BLAST suite v. 2.3.0) [88] with an e-value of  $1e^{-05}$  as cut-off against the  
514 protein coding sequences of the termite *Zootermopsis nevadensis* (official gene set version 2.2)  
515 [89]. To further assist the annotation, we inferred a set of clusters of orthologous sequence groups  
516 (COGs) from the official gene sets at the amino acid level of *C. secundus* (draft version) and *D.*  
517 *melanogaster*, and a BLASTP search of *C. secundus* sequences against the protein coding  
518 sequences (longest isoforms only) of *D. melanogaster* with a threshold e-value of  $1e^{-05}$ .

519 To detect possible TEs, transcripts were searched against the Dfam database (v2.0) [90] using  
520 nhmmer [91]. A transcript was considered TE related if there was a hit against the Dfam database  
521 and the other annotation sources (Pfam, Interpro and BLAST) were not pointing in the direction of  
522 a known gene.

523

#### 524 **Gene identification and construction of gene trees**

525 In addition to the functional annotation, we inferred phylogenetic trees for selected transcripts  
526 (Supplementary Archive 1, DRYAD, doi available upon acceptance of the manuscript). Following  
527 the procedure described in [23], we retrieved protein coding sequences of the respective cluster of  
528 orthologous sequence groups (COGs) from OrthoDB v.9.1 [92] for the following species: *D.*  
529 *melanogaster* (DMEL), *Apis mellifera* (AMEL), *Cardiocondyla obscurior* (COBS), *Polistes*  
530 *canadensis* (PCAN), *Tribolium castaneum* (TCAS), *Z. nevadensis* (ZNEV) and *Blattella germanica*  
531 (BGER). COGs were identified using text search by searching for the gene name or IDs of *D.*  
532 *melanogaster*. In case Selenocysteine (U) was included in sequences, “U” was replaced by “X” to  
533 avoid problems in downstream analyses since many programs cannot handle Selenocysteine  
534 properly. Protein sequences of COGs of above listed species were separately aligned with MAFFT  
535 (v.7.294b) applying the G-INS-i algorithm and otherwise default options [93]. For each multiple  
536 sequence alignment, a profile hidden Markov model (pHMM) was built with hmmbuild (HMMER  
537 v.3.1b2) [86]. Then the pHMM was used to search (hmmsearch) for corresponding protein coding  
538 sequences in *C. secundus* and *Macrotermes natalensis* to identify orthologous candidate sequences  
539 for each COG in both species. For gene (transcript) tree inference, we only kept sequences with a  
540 threshold e-value of  $\leq 1e^{-40}$ . In addition, we annotated all candidate sequences identified in *C.*  
541 *secundus* and *M. natalensis* against the Pfam database (Pfam A, release 30) using hmmscan  
542 (HMMER v.3.1b2).



543 To infer phylogenetic gene trees, we merged for each COG the COGs (amino-acid level) of the  
544 seven species listed above with the putatively orthologous amino-acid sequences of *C. secundus* and  
545 *M. natalensis*. We generated multiple sequence alignments for a total of 29 genes of interest  
546 applying MAFFT (G-INS-i, see above). Ambiguously aligned sequence sections were identified  
547 with Aliscore (v. 2 [94,95]; settings: -r: 10000000 and otherwise defaults) and removed with Alicut  
548 (v. 2.3, <https://www.zfmk.de/en/research/research-centres-and-groups/utilities>; masked alignments  
549 provided as Supplementary Archive S1 (deposited at DRYAD, doi available upon acceptance of the  
550 manuscript). Phylogenetic trees were inferred with IQ-TREE (1.7-beta12 [96] for each gene. The  
551 best model was selected with the implemented ModelFinder [97] from all available nuclear models  
552 implemented in IQ-TREE plus the two protein mixture models LG4M and LG4X [98] based on the  
553 Bayesian Information Criterion (BIC). We applied default settings for rates and the number of rate  
554 categories. Statistical support was inferred from 2,000 non-parametric bootstrap replicates.  
555 Unrooted trees with the bootstrap support mapped were visualized with Seaview (v4.5.4 [99]) and  
556 provided in Newick Format with Supplementary Archive S1 at DRYAD (doi available upon  
557 acceptance of the manuscript).

558

### 559 **Ethics approval and consent to participate**

560 Not applicable

### 561 **Consent for publication**

562 Not applicable

### 563 **Competing interests**

564 The authors declare that they have no competing interests.

565

### 566 **Availability of data and materials**

567 Raw sequence reads are deposited on NCBI (Bioproject XXX, BioSample Accessions see  
568 Additional File 2, Table S1 – Bioproject numbers and BioSample Accessions will be provided  
569 when obtained from NCBI). Additional supplementary data are deposited on the Dryad digital  
570 repository DRYAD (DOI provided upon acceptance of the final manuscript). For Supplementary  
571 Material please contact: [judith.korb@biologie.uni-freiburg.de](mailto:judith.korb@biologie.uni-freiburg.de)

572

### 573 **Funding**

574 This research was supported by the Deutsche Forschungsgemeinschaft by grants to JK (DFG;  
575 KO1895/16-1; KO1895/20-1), one within the Research Unit FOR2281.

576

### 577 **Contributions**

578 JK designed the study, JK and MMK collected and identified the termite samples, MMK performed  
579 all transcriptome analyses, KM helped with gene identification, with data processing and inferred  
580 gene trees, JK did survival analysis and supervised the study, all authors wrote the paper.

581

### 582 **Acknowledgments**

583 We thank Florentine Schaub for assistance in the field and wet lab, Daniela Schnaiter for termite  
584 colony maintenance, Charles Darwin University (Australia), and especially S. Garnett and the  
585 Horticulture and Aquaculture team, provided logistic support to collect *C. secundus*. The Parks and  
586 Wildlife Commission, Northern Territory, the Department of the Environment, Water, Heritage and  
587 the Arts gave permission to collect. Permit numbers 2002 until 2016, export permit numbers:  
588 PWS2001\_1508, PWS2003\_39852, PWS2004\_5769, PWS2007\_4154, PWS2010\_6997,  
589 PWS2014\_001342, PWS2016\_001559; collection permit numbers: 15656, 18310, 26851, 30073,

590 36401, 51402, 59044. The study was conducted according to the Nagoya protocol. KM thanks

591 Ondrej Hlinka and the CSIRO IM&T HPC Cluster team.

592

## 593 **References**

594 1. Jones OR, Scheuerlein A, Salguero-Gómez R, Camarda CG, Schaible R, Casper BB et al.

595 Diversity of ageing across the tree of life. *Nature*. 2014; 505: 169-173.

596 doi:10.1038/nature12789.

597 2. Linford NJ, Bilgir C, Ro J, Pletcher SD. Measurement of lifespan in *Drosophila*

598 *melanogaster*. *J Vis Exp*. 2013;71. doi:10.3791/50068.

599 3. Ungvari Z, Ridgway I, Philipp EER, Campbell CM, McQuary P, Chow T, et al. Extreme

600 longevity is associated with increased resistance to oxidative stress in *Arctica islandica*, the

601 longest-living non-colonial animal. *J Gerontol A Biol Sci Med Sci*. 2011;66:741-50. doi:

602 10.1093/gerona/blr044.

603 4. Rose MR. Evolutionary biology of aging. Oxford University Press; 1991; ill.; 25 cm.

604 5. Keller L, Genoud M. Extraordinary lifespans in ants: a test of evolutionary theories of

605 ageing. *Nature*. 1997;389:958-60. doi: 10.1038/40130.

606 6. Keller L. Queen lifespan and colony characteristics in ants and termites. *Insectes Soc*.

607 1998;45:235-46.. doi: 10.1007/s000400050084.

608 7. Toth AL, Sumner S, Jeanne RL. Patterns of longevity across a sociality gradient in vespid

609 wasps. *Curr Opin insect Sci*. 2016;16:28-35. doi: 10.1016/j.cois.2016.05.006.

- 610 8. Korb J, Thorne B. Sociality in Termites. In: Rubenstein DR, Abbot P, editors. Comparative  
611 Social Evolution. Cambridge: Cambridge University Press; 2017. p. 124-53. doi:  
612 10.1017/9781107338319.006.
- 613 9. Corona M, Velarde RA, Remolina S, Moran-Lauter A, Wang Y, Hughes KA, et al.  
614 Vitellogenin, juvenile hormone, insulin signaling, and queen honey bee longevity. Proc Natl  
615 Acad Sci U S A. 2007;104:7128-33. doi: 10.1073/pnas.0701909104.
- 616 10. Rascon B, Mutti NS, Tolfsen C, Amdam G V. Honey bee life history plasticity:  
617 Development, behavior, and aging. In: Flatt T, Heyland A, editors. Mechanisms of Life  
618 History Evolution: The Genetics and Physiology of Life History Traits and Trade-Offs. New  
619 York: Oxford Univ Press; 2011. p. 253-66.
- 620 11. Rodrigues MA, Flatt T. Endocrine uncoupling of the trade-off between reproduction and  
621 somatic maintenance in eusocial insects. Curr Opin Insect Sci. 2016;16:1-8. doi: 10.
- 622 12. Weitekamp CA, Libbrecht R, Keller L. Genetics and evolution of social behavior in insects.  
623 Annu. Rev. Genet. 2017;51:219-39. doi: 10.1146/annurev-genet-120116-024515.
- 624 13. Maekawa K, Ishitani K, Gotoh H, CornetteR, Miura T. Juvenile Hormone titre and  
625 vitellogenin gene expression related to ovarian development in primary reproductives  
626 compared with nymphs and nymphoid reproductives of the termite *Reticulitermes speratus*.  
627 Physiol Entomol. 2010;35:52-8. doi:10.1111/j.1365-3032.2009.00711.x.
- 628 14. Korb J. Juvenile Hormone: A Central Regulator of Termite Caste Polyphenism. In: Zayed  
629 A, Kent CFBT-A in IP, editors. Genomics, Physiology and Behaviour of Social Insects.  
630 Academic Press; 2015. p. 131-61. doi: 10.1016/bs.aiip.2014.12.004.

- 631 15. Tasaki E, Mitaka Y, Nozaki T, Kobayashi K, Matsuura K, Iuchi Y. High expression of the  
632 breast cancer susceptibility gene BRCA1 in long-lived termite kings. *Aging (Albany NY)*.  
633 2018;10:2668-83. doi: 10.18632/aging.101578.
- 634 16. Wu J, Lu L-Y, Yu X. The role of BRCA1 in DNA damage response. *Protein Cell*.  
635 2010;1:117-23. doi: 10.1007/s13238-010-0010-5.
- 636 17. Tasaki E, Kobayashi K, Matsuura K, Iuchi Y. An Efficient Antioxidant System in a Long-  
637 Lived Termite Queen. *PLoS One*. 2017;12:e0167412. doi: 10.1371/journal.pone.0167412.
- 638 18. Tasaki E, Kobayashi K, Matsuura K, Iuchi Y. Long-Lived Termite Queens Exhibit High  
639 Cu/Zn-Superoxide Dismutase Activity. *Oxid Med Cell Longev*. 2018;2018:5127251. doi:  
640 10.1155/2018/5127251.
- 641 19. Münch D, Amdam G V, Wolschin F. Ageing in a eusocial insect: molecular and  
642 physiological characteristics of life span plasticity in the honey bee. *Funct Ecol*.  
643 2008;22:407-21. doi:10.1111/j.1365-2435.2008.01419.x.
- 644 20. Lucas ER, Keller L. Ageing and somatic maintenance in social insects. *Curr Opin Insect Sci*.  
645 2014;5:31-6. doi: 10.1016/j.cois.2014.09.009.
- 646 21. de Verges J, Nehring V. A critical look at proximate causes of social insect senescence:  
647 damage accumulation or hyperfunction? *Curr Opin Insect Sci*. 2016;16:69-75. doi:  
648 10.1016/j.cois.2016.05.003.
- 649 22. Elsner D, Meusemann K., Korb J. Longevity and transposon defense, the case of termite  
650 reproductives. *Proc Natl Acad Sci U S A*. 2018;115:5504-9. doi: 10.1073/pnas.1804046115

- 651 23. Monroy Kuhn JM, Meusemann K, Korb J. Long live the queen, the king and the commoner?  
652 Transcript expression differences between old and young in the termite *Cryptotermes*  
653 *secundus*. PLoS One. 2019;14:e0210371. doi: 10.1371/journal.pone.0210371.
- 654 24. Evans DS, Kapahi P, Hsueh W-C, Kockel L. TOR signaling never gets old: aging, longevity  
655 and TORC1 activity. Ageing Res Rev. 2011;10:225-37. doi: 10.1016/j.arr.2010.04.001.
- 656 25. Partridge L, Alic N, Bjedov I, Piper MD. Ageing in *Drosophila*: the role of the insulin/Igf  
657 and TOR signalling network. Exp Gerontol. 2011;46:376-81. doi:  
658 10.1016/j.exger.2010.09.003.
- 659 26. Antikainen H, Driscoll M, Haspel G, Dobrowolski R. TOR-mediated regulation of  
660 metabolism in aging. Aging Cell. 2017;16:1219-33. doi: 10.1111/accel.12689.
- 661 27. Libbrecht R, Corona M, Wende F, Azevedo DO, Serrão, JR, Keller L. Interplay between  
662 insulin signaling, juvenile hormone, and vitellogenin regulates maternal effects on  
663 polyphenism in ants. Proc Natl Acad Sci U S A. 2013;110:11050-55. doi:  
664 10.1073/pnas.1221781110.
- 665 28. Mutti NS, Dolezal AG, Wolschin F, Mutti JS, Gill KS, Amdam GV. IRS and TOR nutrient-  
666 signaling pathways act via uvenile hormone to influence honey bee caste fate. J Experim.  
667 Biol. 2011;214:3977-84. doi: 10.1242/jeb.061499.
- 668 29. Amdam GV, Norberg K, Fondrk MK, Page RE Jr. Reproductive ground plan may mediate  
669 colony-level selection effects on individual foraging behavior in honey bees. Proc Natl Acad  
670 Sci U S A. 2004;101:11350-55. doi: 10.1073/pnas.0403073101.
- 671 30. Warner MR, Qiu L, Holmes MJ, Mikheyev AS, Linksvayer TA. Convergent eusocial  
672 evolution is based on a shared reproductive groundplan plus lineage-specific plastic genes.  
673 Nat. Commun. 2019;10:2651. doi: 10.1038/s41467-019-10546-w.

- 674 31. Chandra V, Fetter-Pruneda I, Oxley PR, Ritger A, McKenzie S, Libbrecht R, Kronauer  
675 DJC. Social regulation of insulin signaling and the evolution of eusociality in ants. *Science*  
676 2018;361:398-402. doi: 10.1126/science.aar5723.
- 677 32. Kim K, Lee YS, Carthew RW. Conversion of pre-RISC to holo-RISC by Ago2 during  
678 assembly of RNAi complexes. *RNA*. 2007;13:22-9. doi: 10.1261/rna.283207.
- 679 33. Sabin LR, Zhou R, Gruber JJ, Lukinova N, Bambina S, Berman A, et al. Ars2 regulates both  
680 miRNA- and siRNA- dependent silencing and suppresses RNA virus infection in  
681 *Drosophila*. *Cell*. 2009;138:340-51. doi: 10.1016/j.cell.2009.04.045.
- 682 34. Ivanov DK, Escott-Price V, Ziehm M, Magwire MM, Mackay TFC, Partridge L, et al.  
683 Longevity GWAS Using the *Drosophila* Genetic Reference Panel. *J Gerontol A Biol Sci*  
684 *Med Sci*. 2015;70:1470-8. doi: 10.1093/gerona/glv047.
- 685 35. Cooper, GM. Protein Synthesis, Processing, and Regulation (Chapter 7). In: *The Cell: A*  
686 *Molecular Approach*. 2nd edition. Sunderland, MA: Sinauer Associates; 2000.
- 687 36. Wong E, Cuervo AM. Integration of clearance mechanisms: the proteasome and autophagy.  
688 *Cold Spring Harb Perspect Biol*. 2010;2:a006734. doi: 10.1101/cshperspect.a006734.
- 689 37. Putiri EL, Robertson KD. Epigenetic mechanisms and genome stability. *Clin Epigenetics*.  
690 2010;2:299-314. doi:10.1007/s13148-010-0017-z.
- 691 38. Gozani O, Shi Y. Histone Methylation in Chromatin Signaling BT - Fundamentals of  
692 Chromatin. In: Workman JL, Abmayr SM, editors. New York, NY: Springer New York;  
693 2014. p. 213-56. doi:10.1007/978-1-4614-8624-4\_5.
- 694 39. Steunou A-L, Rossetto D, Côté J. Regulating Chromatin by Histone Acetylation BT -  
695 Fundamentals of Chromatin. In: Workman JL, Abmayr SM, editors. New York, NY:  
696 Springer New York; 2014. p. 147-212. doi:10.1007/978-1-4614-8624-4\_4.

- 697 40. Plongthongkum N, Kullawong N, Panyim S, Tirasophon W. Ire1 regulated XBP1 mRNA  
698 splicing is essential for the unfolded protein response (UPR) in *Drosophila melanogaster*.  
699 *Biochem Biophys Res Commun.* 2007;354:789-94.
- 700 41. Remondelli P, Renna M. The Endoplasmic Reticulum Unfolded Protein Response in  
701 Neurodegenerative Disorders and Its Potential Therapeutic Significance. *Front Mol*  
702 *Neurosci.* 2017;10:187. doi:10.3389/fnmol.2017.00187.
- 703 42. Gorrini C, Baniasadi PS, Harris IS, Silvester J, Inoue S, Snow B, et al. BRCA1 interacts  
704 with Nrf2 to regulate antioxidant signaling and cell survival. *J Exp Med.* 2013;210:1529-44.  
705 doi: 10.1084/jem.20121337.
- 706 43. Piatek MJ, Werner A. Endogenous siRNAs: regulators of internal affairs. *Biochem Soc*  
707 *Trans.* 2014;42:1174-9. doi:10.1042/BST20140068.
- 708 44. Dang W, Steffen KK, Perry R, Dorsey JA, Johnson FB, Shilatifard A, et al. Histone H4  
709 lysine 16 acetylation regulates cellular lifespan. *Nature.* 2009;459:802-7. doi:  
710 10.1038/nature08085.
- 711 45. Wood JG, Hillenmeyer S, Lawrence C, Chang C, Hosier S, Lightfoot W, et al. Chromatin  
712 remodeling in the aging genome of *Drosophila*. *Aging Cell.* 2010;9:971-8.. doi:  
713 10.1111/j.1474-9726.2010.00624.x.
- 714 46. Larson K, Yan S-J, Tsurumi A, Liu J, Zhou J, Gaur K, et al. Heterochromatin formation  
715 promotes longevity and represses ribosomal RNA synthesis. *PLoS Genet.* 2012;8:e1002473.  
716 doi: 10.1371/journal.pgen.1002473.
- 717 47. Wood JG, Helfand SL. Chromatin structure and transposable elements in organismal aging.  
718 *Front Genet.* 2013;4:274. doi: 10.3389/fgene.2013.00274.



- 719 48. Chen H, Zheng X, Xiao D, Zheng Y. Age-associated de-repression of retrotransposons in  
720 the *Drosophila* fat body, its potential cause and consequence. *Aging Cell*. 2016;15:542-52.  
721 doi:10.1111/ace1.12465.
- 722 49. Wood JG, Jones BC, Jiang N, Chang C, Hosier S, Wickremesinghe P, et al. Chromatin-  
723 modifying genetic interventions suppress age-associated transposable element activation and  
724 extend life span in *Drosophila*. *Proc Natl Acad Sci U S A*. 2016;113:11277-82 doi:  
725 10.1073/pnas.1604621113.
- 726 50. Liu Y, Ye X, Jiang F, Liang C, Chen D, Peng J, et al. C3PO, an endoribonuclease that  
727 promotes RNAi by facilitating RISC activation. *Science*. 2009;325:750-3. doi:  
728 10.1126/science.1176325.
- 729 51. Kandasamy SK, Zhu L, Fukunaga R. The C-terminal dsRNA-binding domain of *Drosophila*  
730 Dicer-2 is crucial for efficient and high-fidelity production of siRNA and loading of siRNA  
731 to Argonaute2. *RNA*. 2017;23:1139-53. doi: 10.1261/rna.059915.116.
- 732 52. Tsuboyama K, Tadakuma H, Tomari Y. Conformational activation of Argonaute by distinct  
733 yet coordinated actions of the Hsp70 and Hsp90 chaperone systems. *Mol Cell*. 2018;70:722-  
734 729.e4. doi: 10.1016/j.molcel.2018.04.010.
- 735 53. Liu Y, Beyer A, Aebersold R. On the dependency of cellular protein levels on mRNA  
736 abundance. *Cell*. 2016;165:535-50. doi: 10.1016/j.cell.2016.03.014.
- 737 54. Cao JQ, Tong WS, Yu HY, Tobe SS, Bendena WG, Hui JHL. Chapter Three - The Role of  
738 MicroRNAs in *Drosophila* Regulation of Insulin-Like Peptides and Ecdysteroid Signalling:  
739 Where Are We Now? In: Verlinden HBT-A in IP, editor. *Insect Epigenetics*. Academic  
740 Press; 2017. p. 55-85. doi: 10.1016/bs.aiep.2017.02.002.

- 741 55. Laplante M, Sabatini DM. mTOR signaling at a glance. *J Cell Sci.* 2009;122 Pt 20:3589-94.  
742 doi: 10.1242/jcs.051011.
- 743 56. Zhao J, Zhai B, Gygi SP, Goldberg AL. mTOR inhibition activates overall protein  
744 degradation by the ubiquitin proteasome system as well as by autophagy. *Proc Natl Acad*  
745 *Sci U S A.* 2015;112:15790-7. doi: 10.1073/pnas.1521919112.
- 746 57. Ichimura Y, Waguri S, Sou Y-S, Kageyama S, Hasegawa J, Ishimura R, et al.  
747 Phosphorylation of p62 activates the Keap1-Nrf2 pathway during selective autophagy. *Mol*  
748 *Cell.* 2013;51:618-31. doi: 10.1016/j.molcel.2013.08.003.
- 749 58. Aramburu J, Ortells MC, Tejedor S, Buxade M, Lopez-Rodriguez C. Transcriptional  
750 regulation of the stress response by mTOR. *Sci Signal.* 2014;7:re2. doi:  
751 10.1126/scisignal.2005326.
- 752 59. Tsakiri EN, Sykiotis GP, Papassideri IS, Terpos E, Dimopoulos MA, Gorgoulis VG, et al.  
753 Proteasome dysfunction in *Drosophila* signals to an Nrf2-dependent regulatory circuit  
754 aiming to restore proteostasis and prevent premature aging. *Aging Cell.* 2013;12:802-13.  
755 doi: 10.1111/accel.12111.
- 756 60. Sykiotis GP, Bohmann D. Keap1/Nrf2 signaling regulates oxidative stress tolerance and  
757 lifespan in *Drosophila*. *Dev Cell.* 2008;14:76-85. doi: 10.1016/j.devcel.2007.12.002.
- 758 61. Tullet JMA, Hertweck M, An JH, Baker J, Hwang JY, Liu S, et al. Direct inhibition of the  
759 longevity-promoting factor SKN-1 by insulin-like signaling in *C. elegans*. *Cell.*  
760 2008;132:1025-38. doi: 10.1016/j.cell.2008.01.030.
- 761 62. Tolfsen CC, Baker N, Kreibisch C, Amdam GV. Flight restriction prevents associative  
762 learning deficits but no changes in brain protein-adduct formation during honeybee ageing .  
763 *J Exp Biol.* 2011;214:1322-32.

- 764 63. Parker JD, Parker KM, Sohal BH, Sohal RS, Keller L. Decreased expression of Cu-Zn  
765 superoxide dismutase 1 in ants with extreme lifespan. *Proc Natl Acad Sci U S A*.  
766 2004;101:3486-9. doi:10.1073/pnas.0400222101.
- 767 64. Heinze J, Schrempf A. Terminal investment: individual reproduction of ant queens increases  
768 with age. *PLoS One*. 2012;7:e35201. doi: 10.1371/journal.pone.0035201.
- 769 65. Korb J, Lenz M. Reproductive decision-making in the termite, *Cryptotermes secundus*  
770 (Kalotermitidae), under variable food conditions. *Behav Ecol*. 2004;15:390-5. doi:  
771 10.1093/beheco/arh033.
- 772 66. Korb J, Katrantzis S. Influence of environmental conditions on the expression of the sexual  
773 dispersal phenotype in a lower termite: implications for the evolution of workers in termites.  
774 *Evol Dev*. 2004;6:342-52. doi: 10.1111/j.1525-142X.2004.04042.x.
- 775 67. IBM Corp. Released 2015. IBM SPSS Statistics for Windows, Version 23.0. Armonk, NY:  
776 IBM Corp.
- 777 68. Andrews S. FastQC: a quality control tool for high throughput sequence data. 2010.  
778 <http://www.bioinformatics.babraham.ac.uk/projects/fastqc>.
- 779 69. Bray NL, Pimentel H, Melsted P, Pachter L. Near-optimal probabilistic RNA-seq  
780 quantification. *Nat Biotech*. 2016;34:525-7. doi:10.1038/nbt.3519.
- 781 70. Harrison MC, Jongepier E, Robertson HM, Arning N, Bitard-Feildel T, Chao H, et al.  
782 Hemimetabolous genomes reveal molecular basis of termite eusociality. *Nat Ecol Evol*.  
783 2018;2:557-66. doi: 10.1038/s41559-017-0459-1.
- 784 71. Love MI, Huber W, Anders S. Moderated estimation of fold change and dispersion for  
785 RNA-seq data with DESeq2. *Genome Biol*. 2014;15:550. doi: 10.1186/s13059-014-0550-8.

- 786 72. R Core Team. 2018 R: A Language and Environment for Statistical Computing (R  
787 Foundation for Statistical Computing, Vienna). <https://www.R-project.org/>.
- 788 73. Nueda MJ, Martorell-Marugan J, Marti C, Tarazona S, Conesa A. Identification and  
789 visualization of differential isoform expression in RNA-seq time series. *Bioinformatics*.  
790 2018;34:524-6. doi: 10.1093/bioinformatics/btx578.
- 791 74. Nueda MJ, Tarazona S, Conesa A. Next maSigPro: updating maSigPro bioconductor  
792 package for RNA-seq time series. *Bioinformatics*. 2014;30:2598-602.  
793 doi:10.1093/bioinformatics/btu333.
- 794 75. Langfelder P, Horvath S. WGCNA: an R package for weighted correlation network analysis.  
795 *BMC Bioinformatics*. 2008;9:559. doi:10.1186/1471-2105-9-559.
- 796 76. Zhang B, Horvath S. A general framework for weighted gene co-expression network  
797 analysis. *Stat Appl Genet Mol Biol*. 2005;4:Article17. doi: 10.2202/1544-6115.1128.
- 798 77. Horvath S, Dong J. Geometric interpretation of gene coexpression network analysis. *PLoS*  
799 *Comput Biol*. 2008;4:e1000117. doi: 10.1371/journal.pcbi.1000117.
- 800 78. Yip AM, Horvath S. Gene network interconnectedness and the generalized topological  
801 overlap measure. *BMC Bioinformatics*. 2007;8:22. doi:10.1186/1471-2105-8-22.
- 802 79. Langfelder P, Zhang B, Horvath S. Defining clusters from a hierarchical cluster tree: the  
803 Dynamic Tree Cut package for R. *Bioinformatics*. 2008;24:719-20. doi:  
804 10.1093/bioinformatics/btm563.
- 805 80. Shannon P, Markiel A, Ozier O, Baliga NS, Wang JT, Ramage D, et al. Cytoscape: a  
806 software environment for integrated models of biomolecular interaction networks. *Genome*  
807 *Res*. 2003;13:2498-504. doi: 10.1101/gr.1239303.

- 808 81. Kucera M, Isserlin R, Arkhangorodsky A, Bader GD. AutoAnnotate: A Cytoscape app for  
809 summarizing networks with semantic annotations. *F1000Research*. 2016;5:1717.  
810 doi:10.12688/f1000research.9090.1.
- 811 82. Enright AJ, Van Dongen S, Ouzounis CA. An efficient algorithm for large-scale detection of  
812 protein families. *Nucleic Acids Res*. 2002;30:1575-84.
- 813 83. Maere S, Heymans K, Kuiper M. BiNGO: a Cytoscape plugin to assess overrepresentation  
814 of Gene Ontology categories in Biological Networks. *Bioinformatics*. 2005;21:3448-9. doi:  
815 10.1093/bioinformatics/bti551.
- 816 84. Benjamini Y, Hochberg Y. Controlling the False Discovery Rate: A Practical and Powerful  
817 Approach to Multiple Testing. *J R Stat Soc Ser B*. 1995;57:289-300.  
818 <http://www.jstor.org/stable/2346101>.
- 819 85. Finn RD, Coghill P, Eberhardt RY, Eddy SR, Mistry J, Mitchell AL, et al. The Pfam protein  
820 families database: towards a more sustainable future. *Nucleic Acids Res*. 2016;44:D279-85.  
821 doi: 10.1093/nar/gkv1344.
- 822 86. Eddy SR. Accelerated Profile HMM Searches. *PLoS Comput Biol*. 2011;7:e1002195. doi:  
823 10.1371/journal.pcbi.1002195.
- 824 87. Jones P, Binns D, Chang H-Y, Fraser M, Li W, McAnulla C, et al. InterProScan 5: genome-  
825 scale protein function classification. *Bioinformatics*. 2014;30:1236-40. doi:  
826 10.1093/bioinformatics/btu031.
- 827 88. Altschul SF, Gish W, Miller W, Myers EW, Lipman DJ. Basic local alignment search tool. *J*  
828 *Mol Biol*. 1990;215:403-10. doi: 10.1016/S0022-2836(05)80360-2.

- 829 89. Terrapon N, Li C, Robertson HM, Ji L, Meng X, Booth W, et al. Molecular traces of  
830 alternative social organization in a termite genome. *Nat Commun.* 2014;5:3636. doi:  
831 10.1038/ncomms4636.
- 832 90. Hubley R, Finn RD, Clements J, Eddy SR, Jones TA, Bao W, et al. The Dfam database of  
833 repetitive DNA families. *Nucleic Acids Res.* 2016;44:D81-9. doi: 10.1093/nar/gkv1272.
- 834 91. Wheeler TJ, Eddy SR. nhmmer: DNA homology search with profile HMMs.  
835 *Bioinformatics.* 2013;29:2487-9. doi: 10.1093/bioinformatics/btt403.
- 836 92. Zdobnov EM, Tegenfeldt F, Kuznetsov D, Waterhouse RM, Simao FA, Ioannidis P, et al.  
837 OrthoDB v9.1: cataloging evolutionary and functional annotations for animal, fungal, plant,  
838 archaeal, bacterial and viral orthologs. *Nucleic Acids Res.* 2017;45:D744-9. doi:  
839 10.1093/nar/gkw1119.
- 840 93. Katoh K, Standley DM. MAFFT multiple sequence alignment software version 7:  
841 improvements in performance and usability. *Mol Biol Evol.* 2013;30:772-80.  
842 doi:10.1093/molbev/mst010-
- 843 94. Misof B, Misof K. A Monte Carlo approach successfully identifies randomness in multiple  
844 sequence alignments: a more objective means of data exclusion. *Syst Biol.* 2009;58:21-34.  
845 doi: 10.1093/sysbio/syp006.
- 846 95. Kück P, Meusemann K, Dambach J, Thormann B, von Reumont BM, Wägele JW et al.  
847 Parametric and non-parametric masking of randomness in sequence alignments can be  
848 improved and leads to better resolved trees. *Front Zool.* 2010;7:10. doi: 10.1186/1742-9994-  
849 7-10.
- 850 96. Nguyen L-T, Schmidt HA, Von Haeseler A, Minh BQ. IQ-TREE: a fast and effective  
851 stochastic algorithm for estimating maximum-likelihood phylogenies. *Mol Biol Evol.*

- 852           2015;32:268-74. doi: 10.1093/molbev/msu300.
- 853           97. Kalyaanamoorthy S, Minh BQ, Wong TKF, von Haeseler A, Jermin LS. ModelFinder: fast  
854           model selection for accurate phylogenetic estimates. *Nat Methods*. 2017;14:587-9. doi:  
855           10.1038/nmeth.4285.
- 856           98. Le SQ, Dang CC, Gascuel O. Modeling protein evolution with several amino acid  
857           replacement matrices depending on site rates. *Mol Biol Evol*. 2012;29:2921-36. doi:  
858           10.1093/molbev/mss112
- 859           99. Gouy M, Guindon S, Gascuel O. SeaView version 4: A multiplatform graphical user  
860           interface for sequence alignment and phylogenetic tree building. *Mol Biol Evol*.  
861           2010;27:221-4. doi: 10.1093/molbev/msp259.

## 862 **FIGURE LEGENDS**

### 863 **Figure 1. Survival plot of *C. secundus* queens.**

864 Shown is the age-dependent survival probability of queens. The median longevity of queens in the  
865 laboratory after successful colony establishment was estimated with Kaplan Meier survival analysis  
866 to be 12 years (mean longevity: 11.1 years). The maximum lifespan was 13 years. After an age of  
867 around 11 years, life expectancy declines rapidly; out of eight queens with a potential age  $\geq 12$   
868 years, all had died, except one 13-year old queen.

869

### 870 **Figure 2. Median expression profiles of DETs assigned to Iso-MaSigPro clusters.**

871 Iso-MaSigPro grouped the differentially expressed transcripts (DET) into six clusters. DETs of  
872 cluster 1, 4 and 6 were especially highly expressed in old queens, while those of cluster 3 and 5  
873 characterized middle-aged queens and those of cluster 2 young queens. The expression values  
874 correspond to normalized counts (see Methods). The youngest queen (age: 2 years) was taken as  
875 time step zero and each of the subsequent older queens (based on chronological age) were  
876 considered to be one time step older. One age class (time step 8; age: 10 years) consisted of two  
877 samples.

878

### 879 **Figure 3. Young subnetwork highlighting Iso-MaSigPro DETs.**

880 Shown is WGCNA-based co-expression network of transcripts, which contains DETs characterising  
881 young and middle-aged queens and their one- and two-step neighbors (*i.e.*, young subnetwork; for  
882 more information, see text and Additional File 1, Figure S1 and S2). Highlighted are the Iso-  
883 MaSigPro DETs of cluster 2, 3, and 5, characterizing young and middle-aged queens (see insert;  
884 Fig. 2). Node colors correspond to the WGCNA modules. Transposable element (TE) related  
885 transcripts are highlighted with a '?'. Transcripts with an asterisk indicate 1:1 orthologs (*C.*



886 *secundus* and *D. melanogaster*). Connection length and width do not have a meaning. Red circles  
887 indicate transcripts discussed in the text.

888

889 **Figure 4. Genes related to protein synthesis that were found in the old subnetwork.**

890 Shown are genes that have been related to various processes of protein synthesis, from initiation,  
891 and elongation to termination. For all genes listed, corresponding transcripts were present in the old  
892 subnetwork of *C. secundus* queens. Figure modified after [35].

893

894 **Figure 5. Genes related to the proteasome complex that were found in the old subnetwork.**

895 Shown are genes that have been related to the proteasome complex. The textbox in red indicates  
896 subunits, for which we found transcripts in the old subnetwork. Figure modified after [36].

897

898 **Figure 6. Transcription- and proteostasis-related expression pattern in old *Cryptotermes***

899 *secundus* queens.

900 Depicted is the expression patterns of genes related to transcription and proteostasis for old *C.*  
901 *secundus* queens (red arrows) in contrast to that reported for other species (grey arrows). Old *C.*  
902 *secundus* queens were characterized by a very strong proteostasis signal indicative of an  
903 upregulation of protein degradation, together with protein synthesis and protein folding. This is  
904 unusual because old organisms are typically characterized by a downregulation of these processes.  
905 The simultaneous activation of protein synthesis and degradation in old *C. secundus* queens can be  
906 explained by the activity of the transcription factor *cnc/Nrf-2* (for more details, see text). The inner  
907 cycle arrows depict the protein life cycle; dashed arrows indicate the special case when mistakes/  
908 errors occur. After a protein is degraded, its components are recycled.

909

910 **Figure 7. Aging signal of *C. secundus* queens in relation to known aging pathways.**

911 Shown are simplified IIS (insulin/insulin-like growth factor signaling; blue), TOR (target of  
912 rapamycin; green), and ecdysone (brown) pathways and their interactions with an emphasis on **A.**  
913 ecdysone biosynthesis and **B.** protein synthesis and degradation. Red encircled genes were members  
914 of the old subnetwork, and thus highly expressed in old queens. Important genes that regulate  
915 protein synthesis and degradation are depicted in white. In short, the TOR pathway controls cell  
916 growth and metabolism in response to amino acid availability. It is generally composed of two main  
917 complexes: TORC1 and TORC2 [55]. Activation of TORC1 promotes mRNA translation, for  
918 instance, via S6K /eIF4B / eIF-4a and 4E-BP / eIF4E. Additionally, active TORC1 inhibits  
919 autophagy by targeting upstream components necessary for autophagy activation, like Atg1. TOR  
920 interacts with IIS, which also regulates multiple physiological functions, including aging.  
921 Generally, an active IIS pathway can activate the TORC1 complex via phosphorylation and  
922 inactivation of Tsc2 by AKT. AKT inhibits the transcription factor foxo via phosphorylation, which  
923 results in the inhibition of transcription of many downstream genes, e.g. involved in lifespan  
924 extension, stress response and autophagy. Stress induced *Cnc* can activate TORC1 in a positive  
925 feedback loop (big dashed arrow). It may be responsible for the simultaneous upregulation of  
926 protein synthesis and degradation. For more information, see text. Figures are adapted after [53-55].

927

928

## 929 **Additional Files**

### 930 **Additional File 1 (Additional\_File\_1.pdf): Supplementary Figures S1-S10.**

931 Figure S1: Schematic workflow. Details are explained in the Methods.

932 Figure S2: WGCNA modules of co-expressed transcripts that negatively correlate with age.

933 Modules marked with an asterisk were found in the young subnetwork. Modules are named after  
934 colors by WGCNA.

935 Figure S3: WGCNA modules of co-expressed transcripts that positively correlate with age.

936 Modules marked with an asterisk were found in the old subnetwork. Modules are named after colors  
937 by WGCNA.

938 Figure S4: GO enrichment for the WGCNA module ‘tan’ that positively correlated with age and  
939 which had many old-age DETs. Details are shown for BP (Biological Process), which revealed an  
940 enrichment of transcripts for ribosomal and tRNA related functions.

941 Figure S5: Young and old transcript subnetworks corresponding to the second level neighborhood  
942 of Iso-MaSigPro DETs. Age-related DETs were located in the WGCNA co-expression network and  
943 these DETs and their one- and two-step neighbors (*i.e.*, the ‘second level neighborhood’) were then  
944 extracted from the co-expression network to provide the shown networks.

945 Figure S6: BiNGO GO enrichment (Biological Process) for the young subnetwork. No terms were  
946 significantly enriched after correcting for multiple testing (FDR).

947 Figure S7: BiNGO GO enrichment (Biological Process) for the old subnetwork. Colored nodes are  
948 GO terms that were significantly enriched after correcting for multiple testing (FDR).

949 Figure S8: BiNGO GO enrichment of (Molecular Function; Cellular Component) for the old  
950 subnetwork. Colored nodes are GO terms that were significantly enriched after correcting for  
951 multiple testing (FDR).

952 Figure S9: BiNGO GO enrichment (Biological Process; Molecular Function; Cellular Component)  
953 for the ‘green’ WGCNA module, which is part of the old subnetwork. Colored nodes are GO terms  
954 that were significantly enriched after correcting for multiple testing (FDR).

955 Figure S10: BiNGO GO enrichment (Biological Process, Molecular Function; Cellular Component)  
956 for the ‘paleturquoise’ WGCNA module, which is part of the old subnetwork. Nodes in color are  
957 GO terms significantly enriched after correcting for multiple testing (FDR).

958

959 **Additional File 2 (Additional\_File\_2.xlsx): Supplementary Tables S1-S4.**

960 Table S1: Sample information of samples included in this study.

961 Table S2: Differentially expressed transcripts of the Iso-MaSigPro analysis, separately for cluster 1-  
962 6.

963 Table S3. Transcripts in the young subnetwork (SNW).

964 Transcripts in the young subnetwork (SNW) classified into major categories; TE-related transcripts  
965 of the young subnetwork (SNW).

966 Table S4. Transcripts in the old subnetwork (SNW).

967 Transcripts in the old subnetwork (SNW) classified into major categories; TE-related transcripts of  
968 the old subnetwork (SNW).

969

970 **Additional File 3 (Additional\_File\_3.pdf)**

971 WGCNA module-age associations. Listed are the eigengene values for each module.

972

973 **Additional File 4 (Additional\_File\_4.xlsx): Supplementary Table S5.**

974 Go terms for enriched differentially expressed transcripts (DETs) included in BiNGO module  
975 green; BiNGO module paleturquoise; BiNGO module tan; BiNGO module Thistle2; BiNGO

976 module snow; BiNGO module cyan; BiNGO module deeppink1; BiNGO module navajowhite;

977 BiNGO module blue2\_NS; BiNGO module cornflowerblue\_NS; BiNGO module pink3\_NS;

978 BiNGO module steelblue4\_NS.

979

## 980 **Supplementary Archive 1**

981 The Supplementary Archive includes i) masked multiple sequence alignments (MSAs) of 29

982 selected genes (subdirectory “MSAs” used for ML gene tree inference in FASTA format) in IQ-

983 TREE and ii) inferred ML gene trees (subdirectory “ML\_gene\_trees” in NEWICK format) for each

984 of the 29 genes including non-parametric statistical bootstrap support. These gene trees additionally

985 helped to ensure a proper assignment of transcripts to repective genes.

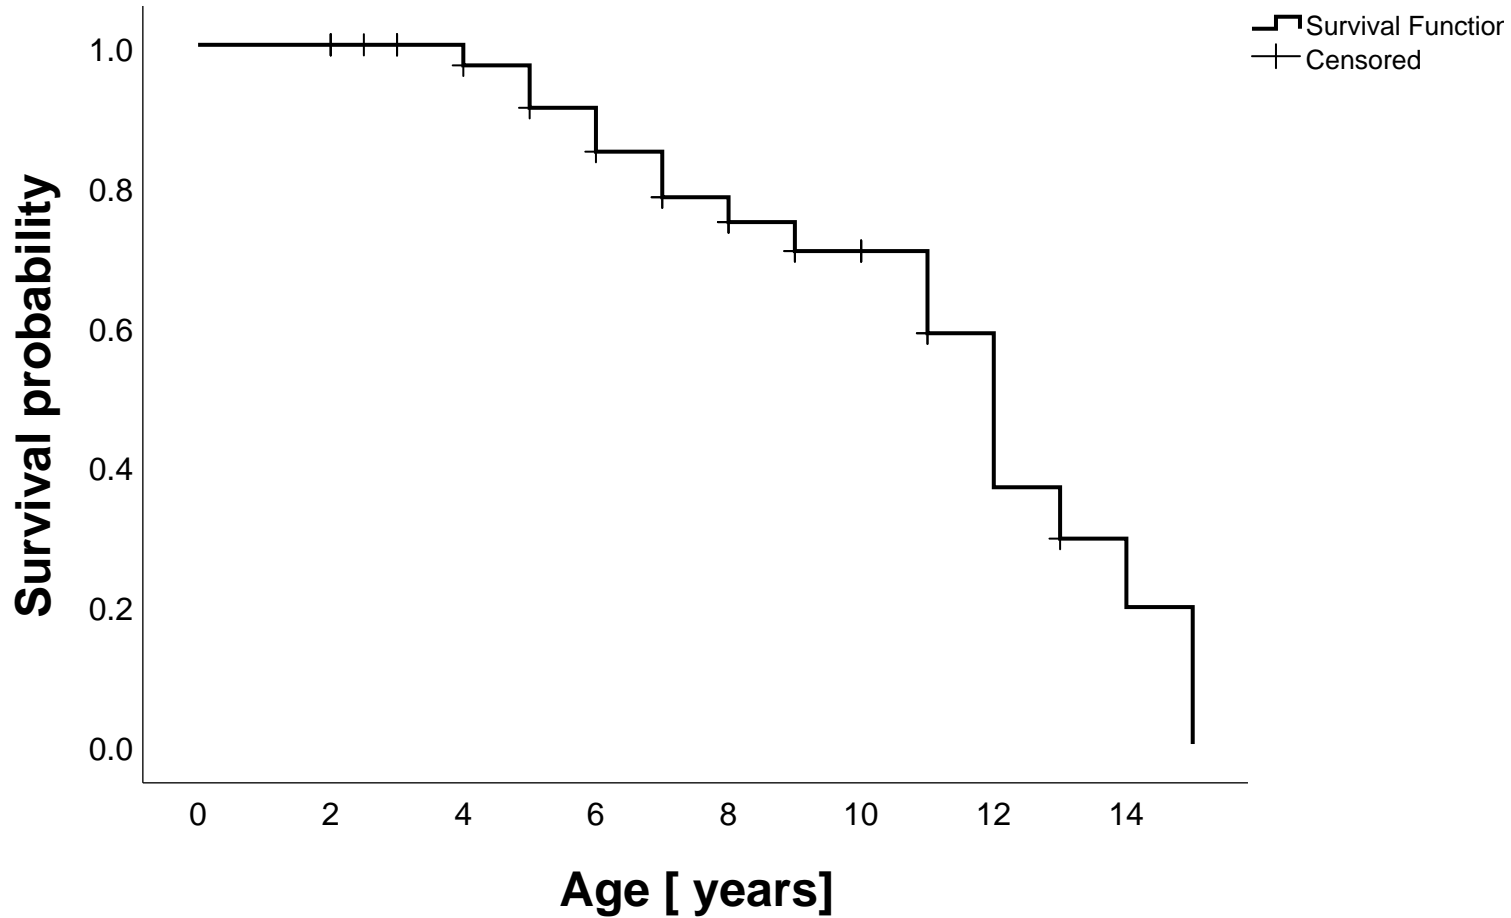

**Cluster 1**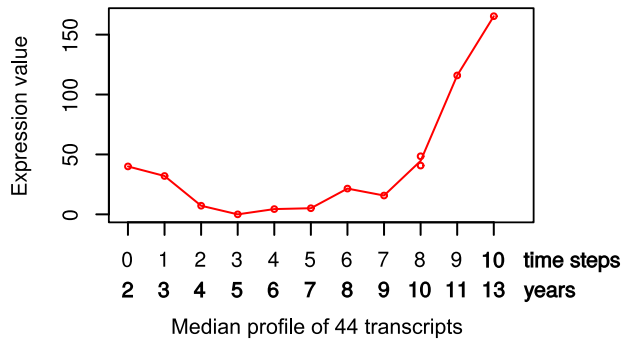**Cluster 2**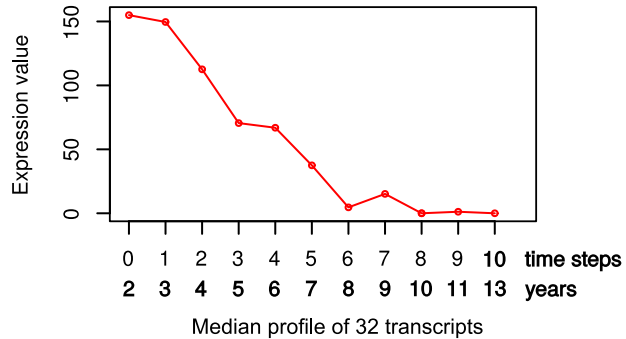**Cluster 3**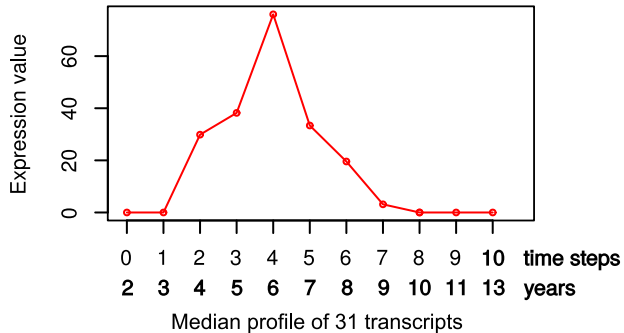**Cluster 4**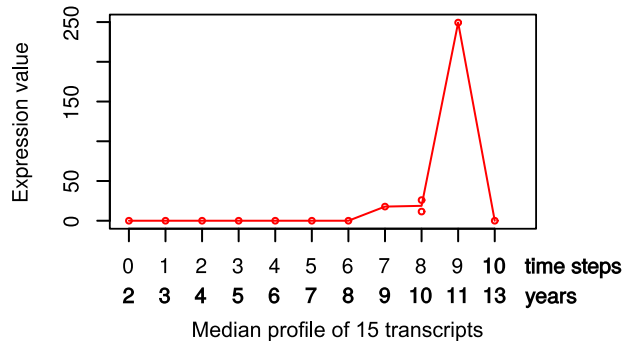**Cluster 5**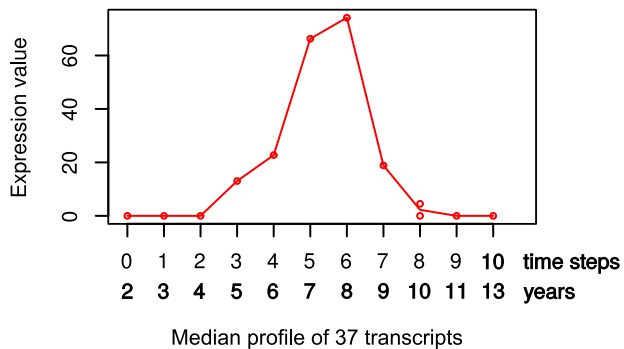**Cluster 6**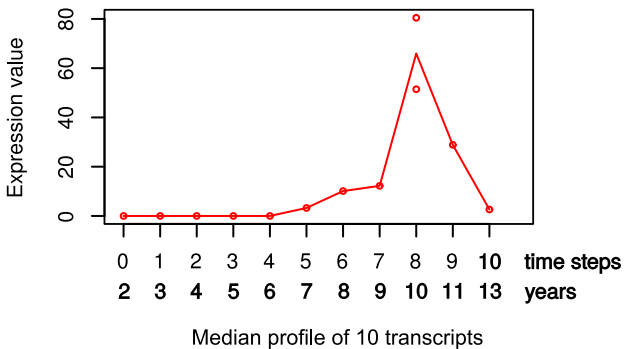

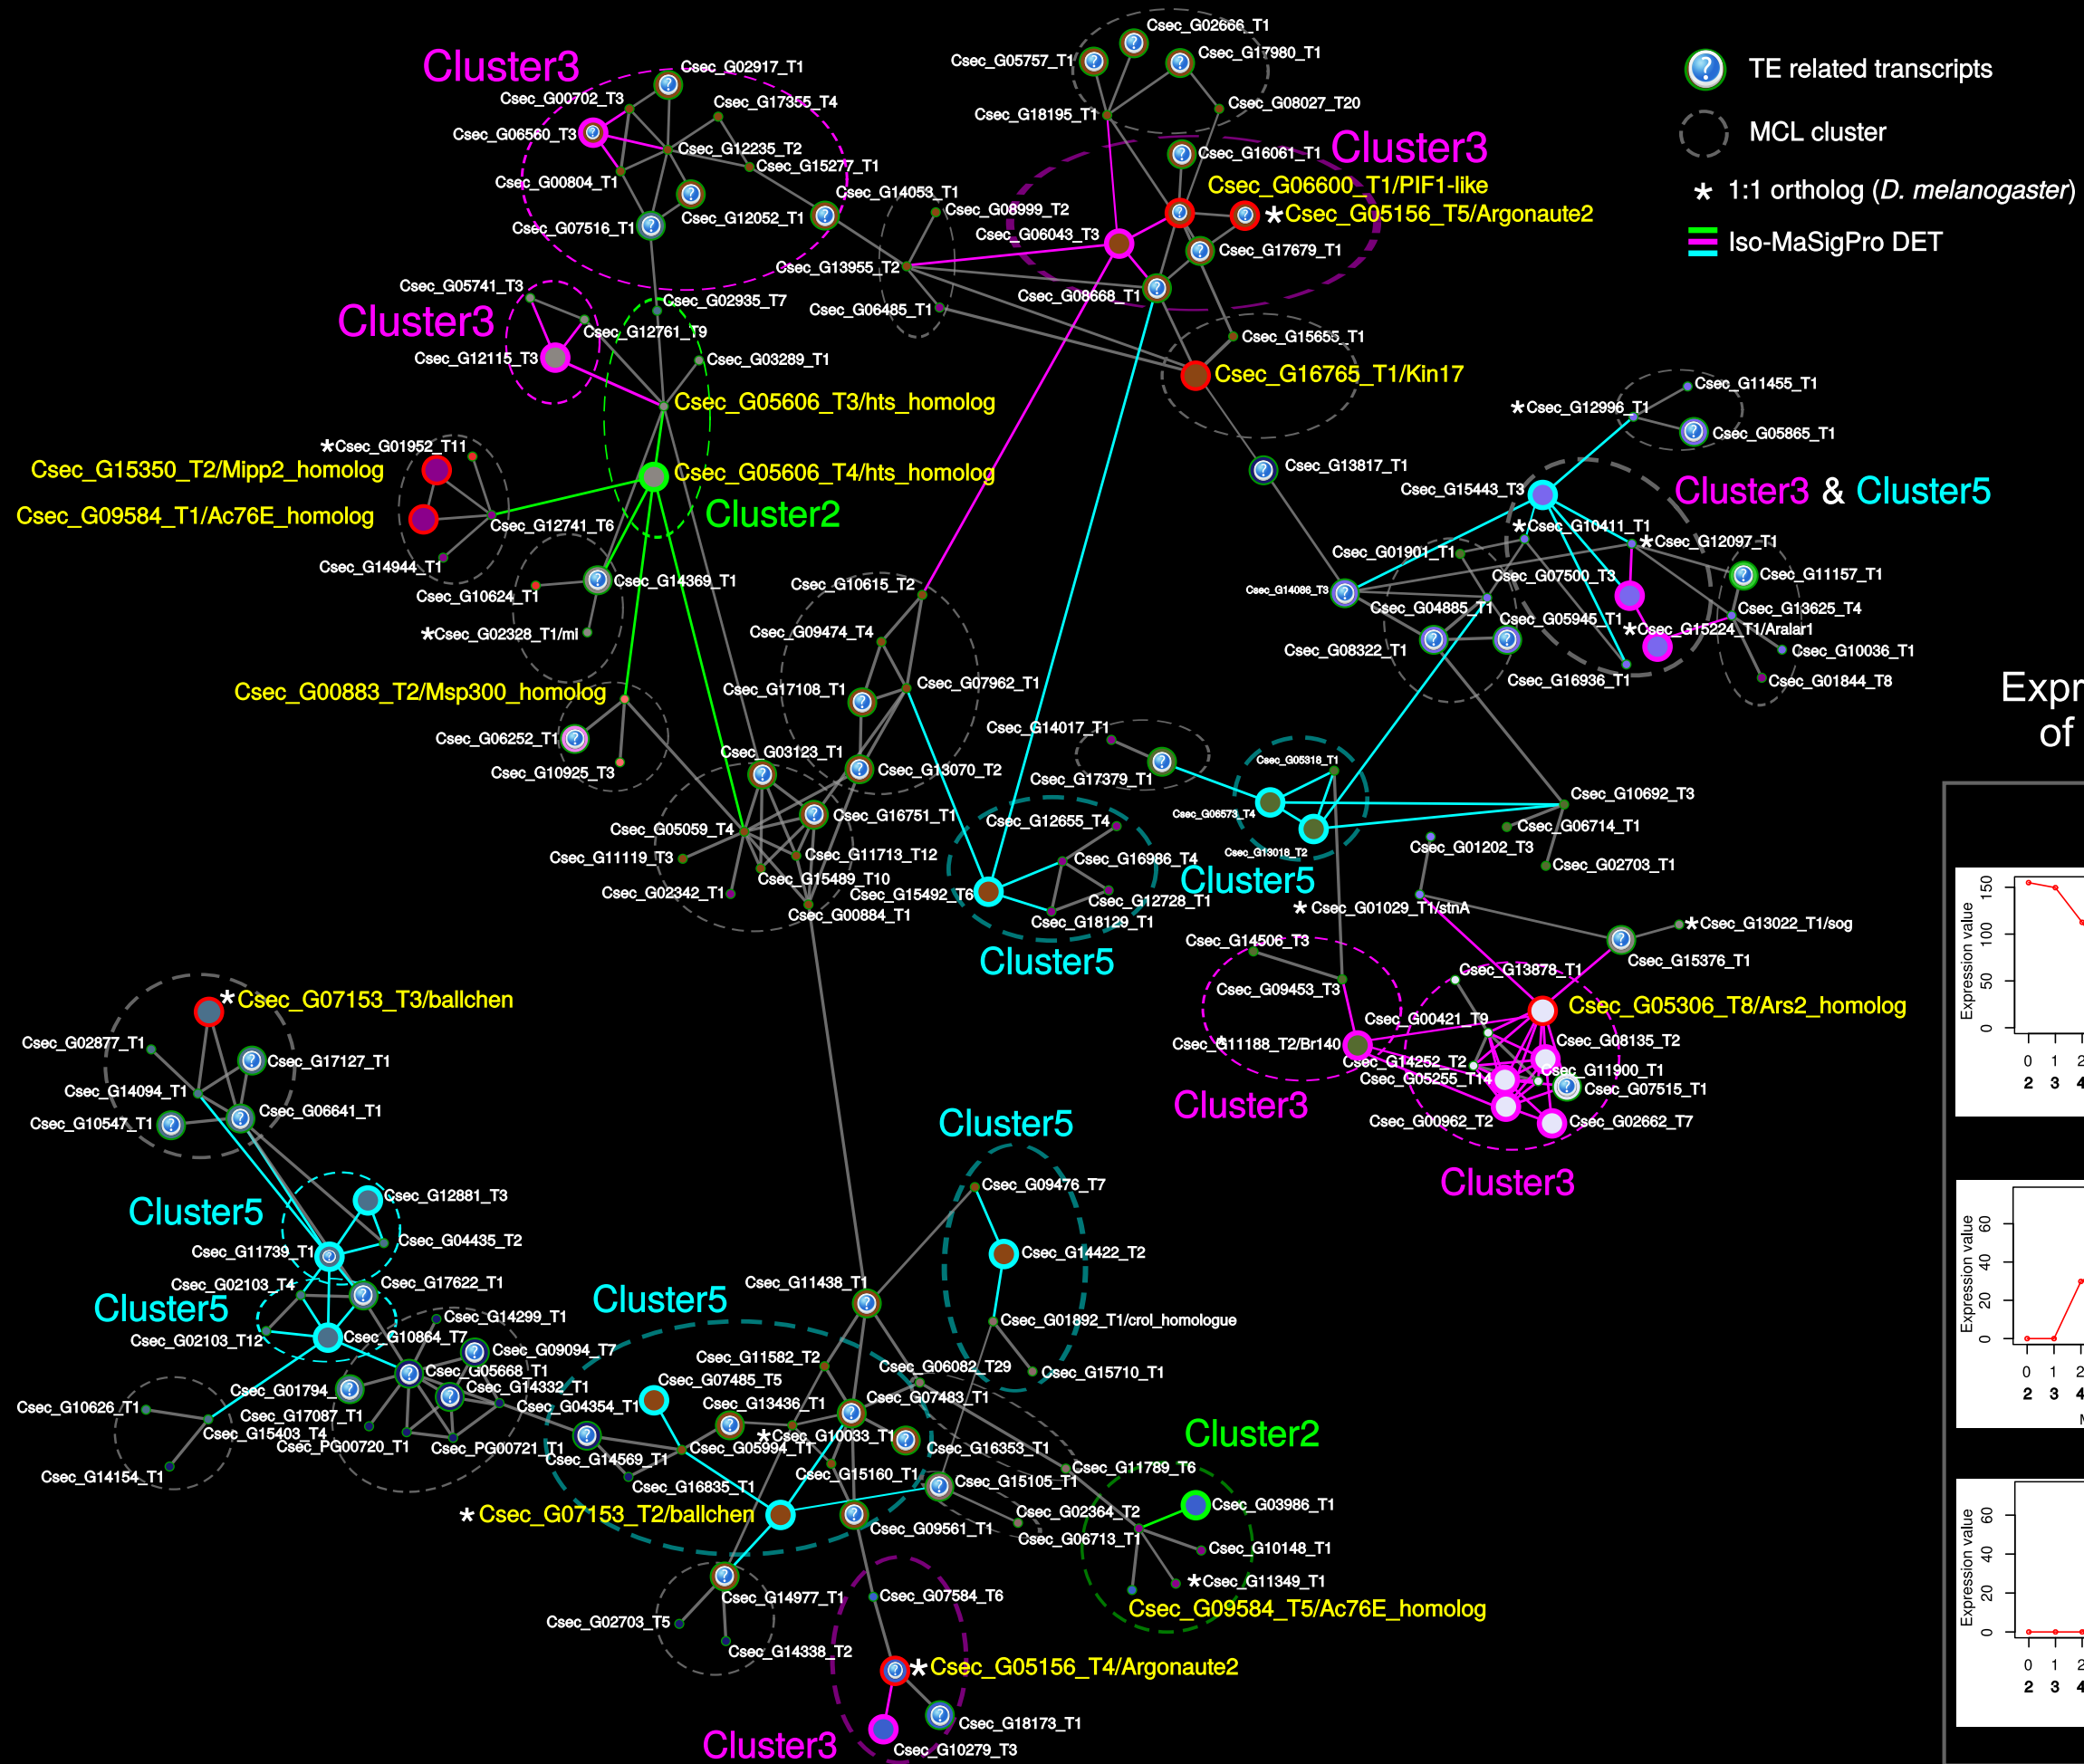

### Expression patterns of Iso-MaSigPro

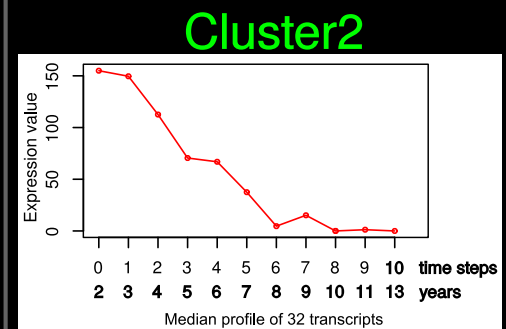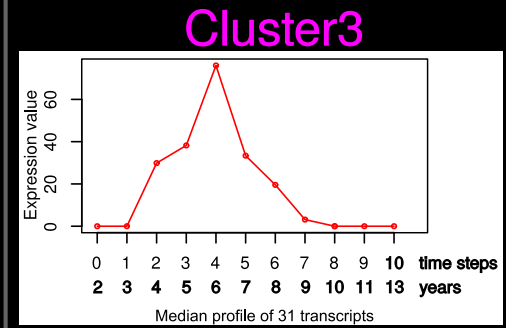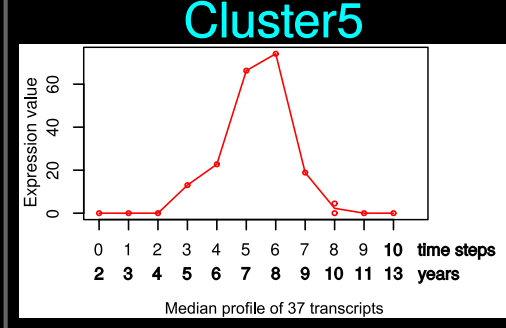



## Initiation

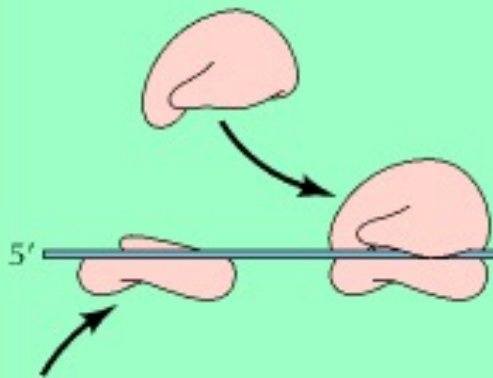

Ribosome binds mRNA at start codon

eIF3h  
eIF3f1  
eIF2A  
eIF4A  
eIF3c  
eIF4B  
eIF3l  
eIF1  
eIF5B  
eIF2gamma  
eIF2beta  
eIF3k  
eIF3d1  
eIF3i  
eIF2Bepsilon  
eIF2alpha

eIF3j  
eIF6  
eIF4G1

## Elongation

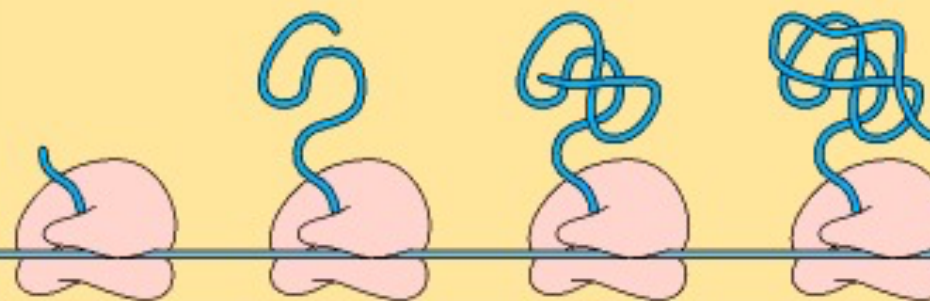

Polypeptide chain elongates by successively adding amino acids

eEF1gamma  
eEF1beta  
eEF1beta  
eEF1delta

## Termination

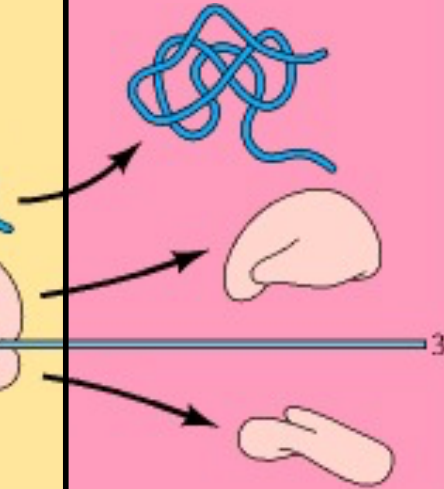

When a stop codon is encountered, polypeptide is released and ribosome dissociates

eRF3

## Ribosomal proteins

|            |            |        |          |
|------------|------------|--------|----------|
| RpL28      | RpL24-like | RpLP1  | RpS13    |
| RpL18A     | RpS3A      | RpS25  | RpS15    |
| RpS26      | RpL4       | RpS18  | RpL6 (3) |
| RpL40      | RpL5       | RpL22  | RpS17    |
| RpLP0-like | RpL23A     | RpS9   |          |
| RpL23      | RpLP0      | RpL27A |          |
| RpL27      | RpS15Aa    | RpL10  |          |
| RpL34a     | RpL18      | RpL36  |          |
| RpL36A     | RpL19      | RpL26  |          |
| RpS30      | RpL8       | RpS23  |          |

## Aminoacyl-tRNA Synthetases

|             |            |
|-------------|------------|
| GluProRS    | ThrRS      |
| CysRS       | LysRS      |
| IleRS       | HisRS      |
| AsnRS       | GlyRS      |
| GlnRS       | ValRS      |
| alpha-PheRS | beta-PheRS |
|             | AsnRS      |

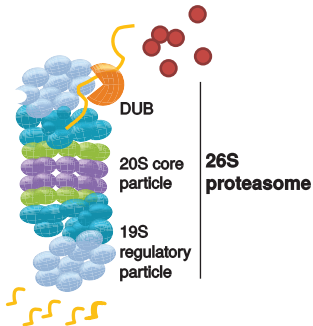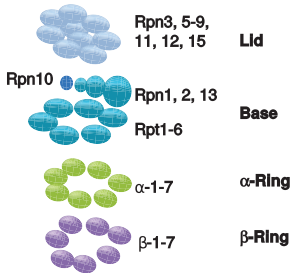

## Subunits in the "old" subnetwork

**Rpn3, 7, 8, 9, 11, 12**

**Rpn2, 10(2)**

**Rpt1, 2, 3, 4, 5**

**3, 4, 5, 7**

**1-7**

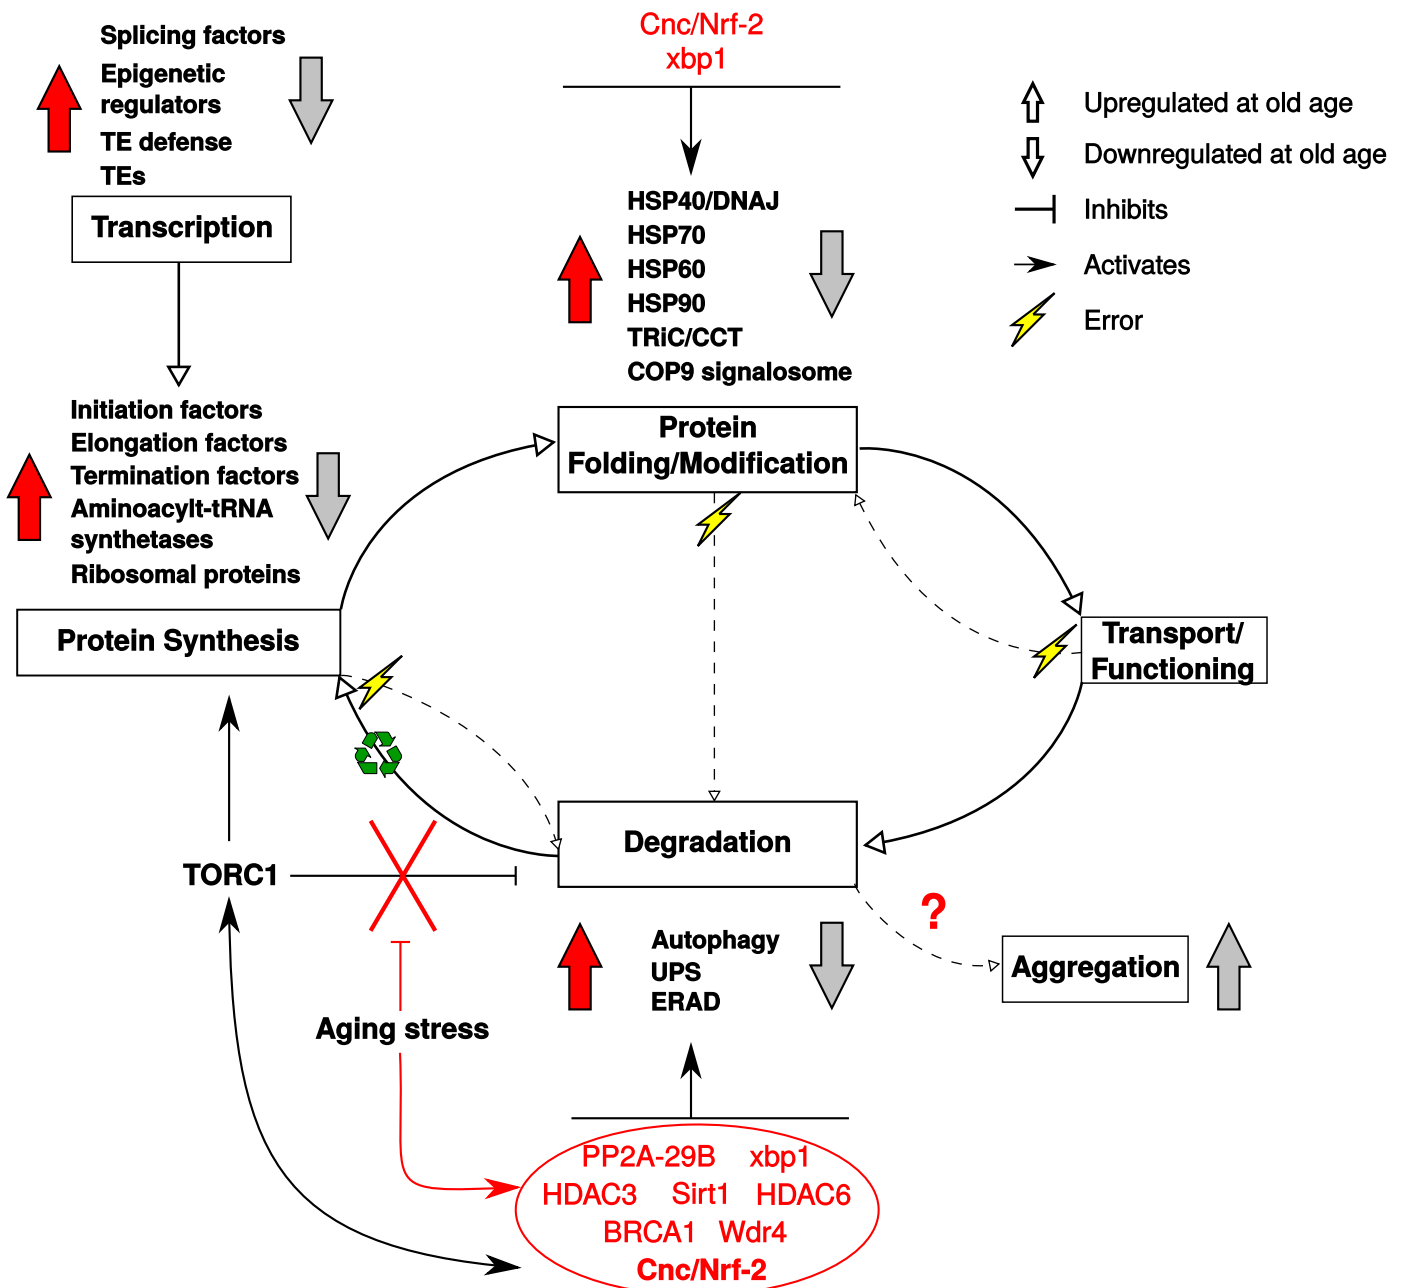

**A**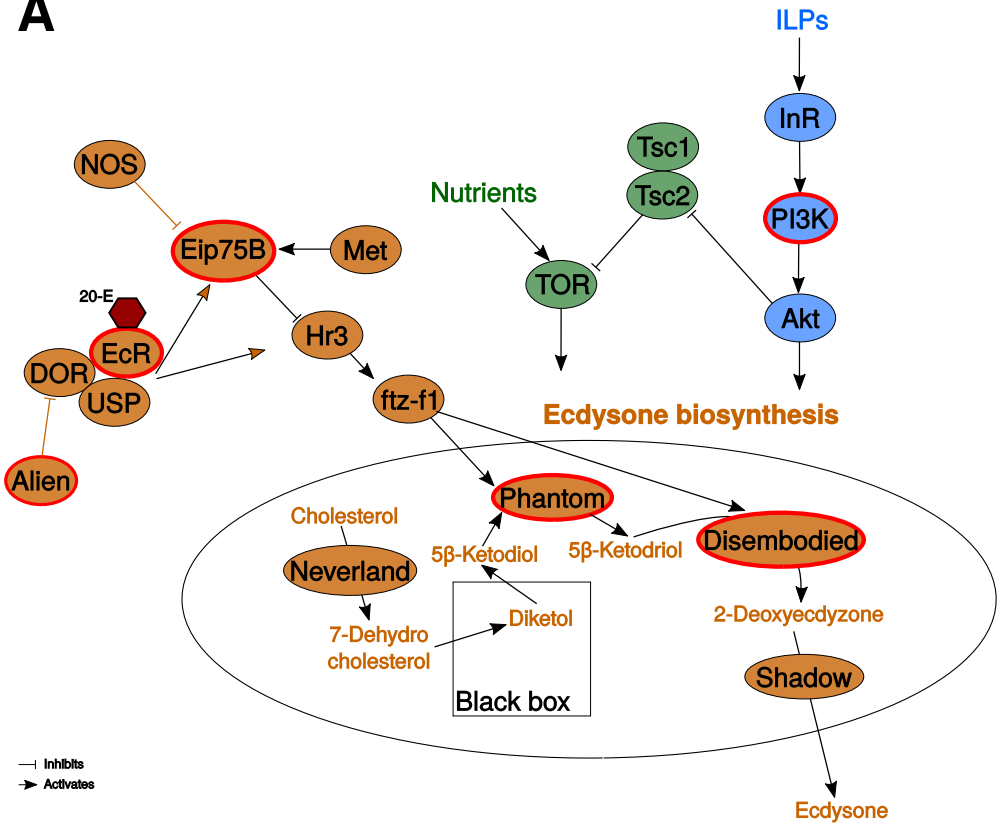**B**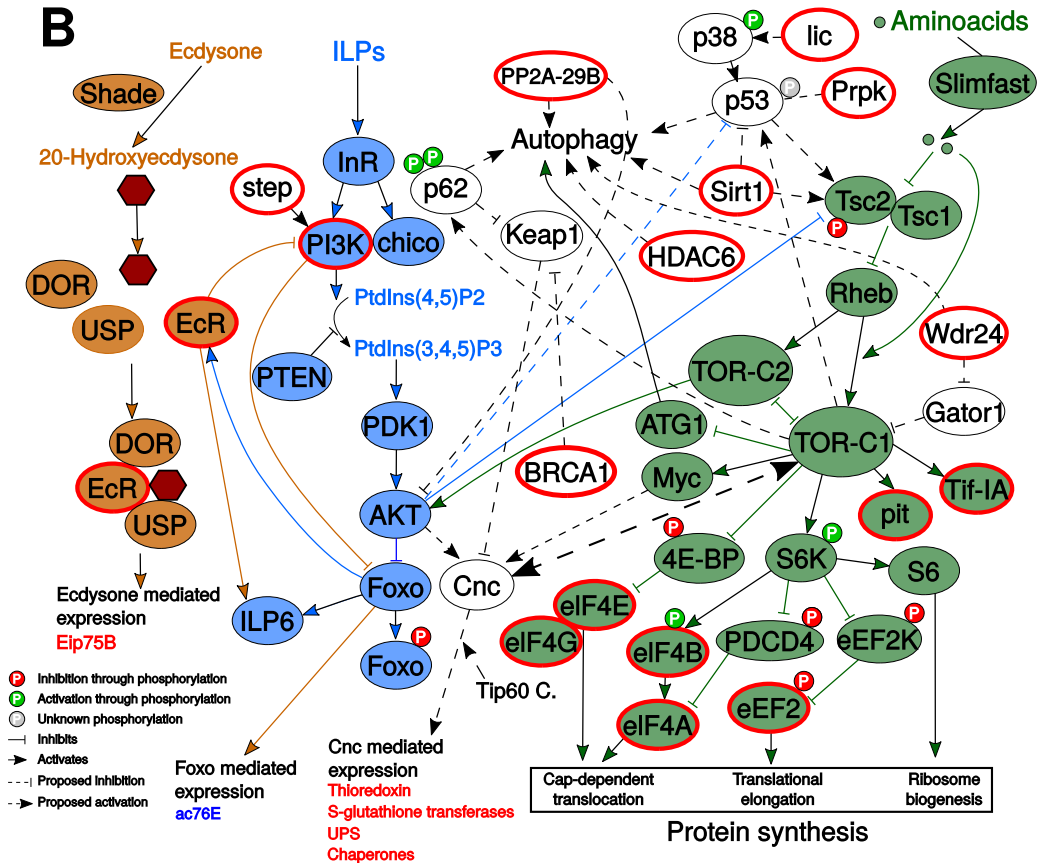

Source: https://www.biorxiv.org/content/10.1101/2020.12.19.423576v1.full.pdf
